# Supplementary material
Source: publisher site journal article supplement (https://www.spandidos-publications.com/8165/downloadSupplementary)
Supplement: Supplementary file 1 [file downloadSupplementary]

## Sheet: circRNA expression change more 
Table SIII. circRNA expression change >2 fold.
Column B and C: log2 value of Normalized Intensity
circRNA	Ischemic	Hemorrhagic group	log2 fold change	fold change	pval
hsa_circRNA_100970	16.121	14.544	-1.45954	2.7502	0.0011074
hsa_circRNA_000816	12.7448	13.8475	1.00179	2.00248	0.000726097
hsa_circRNA_404645	12.8851	13.8414	1.01625	2.02266	0.00319138
hsa_circRNA_058230	12.5844	13.8231	1.05875	2.08312	0.0184332
hsa_circRNA_102534	12.2834	13.7131	1.37791	2.59892	0.00027543
hsa_circRNA_017449	12.6352	13.6227	1.02585	2.03616	0.00190714
hsa_circRNA_022847	12.4642	13.5478	1.13884	2.20204	0.000607006
hsa_circRNA_103670	15.3032	13.3422	-1.9953	3.98699	0.000164397
hsa_circRNA_009012	12.3358	13.2583	1.01791	2.02499	0.0215675
hsa_circRNA_001920	12.1272	13.2338	1.11866	2.17146	0.000511465
hsa_circRNA_002009	12.1393	13.2138	1.15713	2.23013	0.00509662
hsa_circRNA_103410	11.9595	13.1577	1.02294	2.03206	0.00643492
hsa_circRNA_049637	11.8587	13.1283	1.28284	2.43317	0.00336487
hsa_circRNA_090682	12.0096	13.101	1.1832	2.2708	0.0103161
hsa_circRNA_000957	11.8016	13.0517	1.19205	2.28477	0.0112408
hsa_circRNA_022963	11.4819	13.0371	1.3924	2.62515	0.00257647
hsa_circRNA_101328	11.7363	13.0336	1.20576	2.30658	0.00374475
hsa_circRNA_091420	11.9424	13.0086	1.09264	2.13264	0.000397523
hsa_circRNA_005616	14.1891	12.9932	-1.05257	2.07422	0.0144399
hsa_circRNA_102411	11.4691	12.9107	1.39486	2.62962	0.00067009
hsa_circRNA_101698	11.8363	12.9024	1.17503	2.25798	0.00469852
hsa_circRNA_102531	11.645	12.8487	1.20773	2.30974	0.00189246
hsa_circRNA_406918	11.6201	12.8368	1.13298	2.19311	0.00109079
hsa_circRNA_036783	11.4238	12.8183	1.39005	2.62087	0.00463332
hsa_circRNA_400540	11.7565	12.7889	1.03466	2.04864	0.0248502
hsa_circRNA_051907	11.5873	12.7837	1.09992	2.14343	0.0093597
hsa_circRNA_001226	11.7737	12.7689	1.12093	2.17487	0.0334531
hsa_circRNA_048512	11.5537	12.7515	1.26191	2.39813	0.00053303
hsa_circRNA_401366	11.3041	12.7392	1.29008	2.44542	0.0117823
hsa_circRNA_102413	11.1617	12.7359	1.64151	3.11993	0.000181252
hsa_circRNA_051238	11.0593	12.7352	1.70303	3.25583	8.94e-05
hsa_circRNA_051799	10.641	12.7348	1.82868	3.55212	0.0065993
hsa_circRNA_400046	10.9727	12.6974	1.70117	3.25165	1.1e-05
hsa_circRNA_102027	15.1251	12.6897	-2.24343	4.73521	0.000333479
hsa_circRNA_101051	11.3346	12.6587	1.23331	2.35107	0.00125046
hsa_circRNA_405324	11.033	12.6439	1.50783	2.84381	0.00204669
hsa_circRNA_400037	10.67	12.5909	1.83771	3.57443	0.00085479
hsa_circRNA_101179	11.0161	12.5535	1.42363	2.6826	0.000712871
hsa_circRNA_102832	10.7715	12.5302	1.76397	3.39632	2.26e-05
hsa_circRNA_000692	11.4496	12.5239	1.14934	2.21812	0.0128677
hsa_circRNA_405974	10.8066	12.5173	1.61693	3.06721	0.00238245
hsa_circRNA_103086	10.8499	12.5088	1.57877	2.98715	6.94e-05
hsa_circRNA_100001	11.2856	12.5078	1.2387	2.35985	0.0004884
hsa_circRNA_104572	11.3492	12.4526	1.07036	2.09996	0.00136235
hsa_circRNA_092476	14.2332	12.4439	-1.55304	2.93434	0.00180942
hsa_circRNA_407293	11.3001	12.4201	1.19858	2.29513	0.00108583
hsa_circRNA_002124	13.6121	12.4199	-1.18223	2.26927	0.000997157
hsa_circRNA_023523	11.1781	12.412	1.29251	2.44953	0.000418296
hsa_circRNA_405076	11.327	12.4003	1.11646	2.16814	0.000718032
hsa_circRNA_001038	10.6071	12.3813	1.6937	3.23486	0.00827279
hsa_circRNA_027023	11.2503	12.3726	1.14908	2.21773	0.0111138
hsa_circRNA_000281	10.9336	12.3513	1.4112	2.65957	0.000379511
hsa_circRNA_000404	11.0424	12.3248	1.26995	2.41153	0.00167902
hsa_circRNA_037274	10.5379	12.2856	1.63592	3.10785	0.000453239
hsa_circRNA_104569	10.6674	12.2775	1.60345	3.03869	7.61e-05
hsa_circRNA_403691	10.4396	12.2579	1.69694	3.24212	0.0102739
hsa_circRNA_001464	11.0101	12.2536	1.30806	2.47608	0.00402763
hsa_circRNA_010553	10.6814	12.2527	1.46078	2.75258	3.86e-05
hsa_circRNA_406252	10.6535	12.2484	1.51125	2.85058	0.000261263
hsa_circRNA_014234	10.9415	12.233	1.38219	2.60664	0.0116305
hsa_circRNA_104506	10.8803	12.2253	1.28715	2.44045	0.00541061
hsa_circRNA_086026	10.5734	12.2117	1.60013	3.03171	0.000318528
hsa_circRNA_101784	10.4404	12.204	1.79162	3.46203	5.86e-05
hsa_circRNA_102339	10.8087	12.1955	1.28746	2.44097	0.0309923
hsa_circRNA_100388	10.8026	12.1463	1.35037	2.54978	0.0152609
hsa_circRNA_406517	10.4313	12.143	1.62702	3.08874	2.81e-06
hsa_circRNA_101721	10.9948	12.1331	1.0786	2.11198	0.00235989
hsa_circRNA_079276	10.7751	12.132	1.29593	2.45536	0.00602791
hsa_circRNA_000773	10.3977	12.1308	1.81738	3.52441	7.97e-05
hsa_circRNA_405985	10.7837	12.118	1.43727	2.70807	0.00897493
hsa_circRNA_104761	13.4223	12.1046	-1.13518	2.19645	0.00290394
hsa_circRNA_007011	10.9486	12.1031	1.07073	2.10049	2.12e-05
hsa_circRNA_102431	10.843	12.0987	1.26737	2.40723	5.13e-05
hsa_circRNA_092493	10.771	12.0781	1.25399	2.385	0.0139138
hsa_circRNA_103316	10.4939	12.0725	1.64826	3.13455	0.00145921
hsa_circRNA_101971	10.5077	12.0621	1.50925	2.84663	5.17e-05
hsa_circRNA_091774	10.566	12.0589	1.41598	2.66841	1.59e-05
hsa_circRNA_103164	10.6643	12.0317	1.43848	2.71035	0.0189311
hsa_circRNA_405576	10.9291	12.023	1.13371	2.19422	0.000259138
hsa_circRNA_030296	10.6999	12.0025	1.28854	2.4428	8.55e-05
hsa_circRNA_103994	10.3545	11.99	1.68136	3.2073	0.000132199
hsa_circRNA_000401	10.4246	11.98	1.60052	3.03253	0.00260401
hsa_circRNA_405192	10.8569	11.9793	1.03197	2.04482	0.00735661
hsa_circRNA_102465	10.4464	11.9745	1.40991	2.6572	2.51e-06
hsa_circRNA_405815	14.0068	11.9706	-1.77138	3.4138	0.000846302
hsa_circRNA_104650	14.6568	11.9616	-2.44473	5.44426	0.000116795
hsa_circRNA_101725	10.3408	11.9381	1.55584	2.94004	1.98e-05
hsa_circRNA_405304	10.8799	11.9162	1.03995	2.05615	0.00233638
hsa_circRNA_033475	13.4184	11.9156	-1.4001	2.6392	0.00064098
hsa_circRNA_007477	10.7451	11.9114	1.1182	2.17076	0.00132302
hsa_circRNA_001177	10.5727	11.8995	1.23864	2.35976	0.00204153
hsa_circRNA_101473	9.95026	11.8719	1.95453	3.87591	3.28e-05
hsa_circRNA_103478	10.0603	11.8649	1.80799	3.50154	0.000105576
hsa_circRNA_102121	10.0231	11.8422	1.7731	3.41787	0.000338375
hsa_circRNA_063179	10.407	11.8224	1.46434	2.75937	8.39e-05
hsa_circRNA_401635	13.2791	11.7964	-1.46012	2.75132	7.61e-06
hsa_circRNA_074660	9.70188	11.7919	1.98534	3.95956	0.000554853
hsa_circRNA_068367	10.2188	11.7655	1.41815	2.67243	0.000574076
hsa_circRNA_104950	10.6012	11.7532	1.1384	2.20136	0.00459779
hsa_circRNA_102207	9.61762	11.7529	1.99233	3.97879	0.000248242
hsa_circRNA_037128	10.7315	11.7524	1.01913	2.02669	0.00186504
hsa_circRNA_104951	10.588	11.7502	1.1947	2.28898	0.00328963
hsa_circRNA_001161	10.196	11.7422	1.50851	2.84516	0.000212246
hsa_circRNA_005272	10.4323	11.7162	1.21861	2.32723	0.00145904
hsa_circRNA_047460	9.93993	11.7066	1.77002	3.41059	7.6e-06
hsa_circRNA_406200	10.5301	11.7061	1.2021	2.30074	0.000654659
hsa_circRNA_400070	10.5278	11.6996	1.10895	2.15688	0.00982885
hsa_circRNA_103380	10.2765	11.6424	1.35692	2.56138	0.000363322
hsa_circRNA_407330	10.2991	11.6087	1.19658	2.29195	0.00425129
hsa_circRNA_401117	10.0945	11.6029	1.36708	2.57948	0.00183009
hsa_circRNA_000025	9.79343	11.5994	1.68107	3.20665	4.34e-05
hsa_circRNA_003402	10.0813	11.5795	1.41216	2.66136	0.000933105
hsa_circRNA_040097	9.51776	11.5739	1.99415	3.98381	0.000226257
hsa_circRNA_103621	10.6119	11.5727	1.00362	2.00502	0.0011757
hsa_circRNA_049237	9.92361	11.5686	1.64266	3.12241	0.000113851
hsa_circRNA_004867	9.72008	11.5666	1.87048	3.65654	6.7e-05
hsa_circRNA_103846	10.1947	11.5607	1.33072	2.51529	3.61e-08
hsa_circRNA_103559	14.1225	11.551	-2.30726	4.94941	0.00107953
hsa_circRNA_064808	9.94453	11.5406	1.56058	2.94973	0.000184007
hsa_circRNA_102237	9.75551	11.5316	1.67617	3.19579	0.00238415
hsa_circRNA_102443	9.61805	11.531	1.79446	3.46887	0.00101318
hsa_circRNA_104916	9.89219	11.5058	1.57782	2.98517	4.49e-05
hsa_circRNA_050444	10.3509	11.5016	1.18713	2.27699	0.00456739
hsa_circRNA_004466	10.0165	11.5003	1.4592	2.74955	0.000411683
hsa_circRNA_005500	10.1105	11.4922	1.26815	2.40853	0.000895521
hsa_circRNA_001395	14.0061	11.4886	-2.36886	5.16535	0.000137794
hsa_circRNA_404473	9.67088	11.485	1.8619	3.63486	5.17e-05
hsa_circRNA_003391	9.90781	11.4828	1.51288	2.85379	0.000161454
hsa_circRNA_103054	9.33737	11.4817	2.07826	4.22298	8.51e-05
hsa_circRNA_100821	9.98921	11.4804	1.48665	2.80238	7.39e-05
hsa_circRNA_102520	9.72149	11.4746	1.70874	3.26874	3.76e-05
hsa_circRNA_402964	10.1079	11.4712	1.30214	2.46594	0.0201386
hsa_circRNA_400043	9.22176	11.4431	2.12274	4.35521	0.000240461
hsa_circRNA_101159	10.1769	11.4188	1.07256	2.10317	0.00863488
hsa_circRNA_062142	9.59124	11.4174	1.73772	3.33509	4.97e-05
hsa_circRNA_051287	9.12136	11.3859	2.19662	4.58404	7.13e-05
hsa_circRNA_000361	9.48932	11.3729	1.71768	3.28906	0.00470233
hsa_circRNA_400015	10.0172	11.3555	1.39731	2.63411	0.0032125
hsa_circRNA_004646	9.92519	11.3388	1.44148	2.71599	0.00260161
hsa_circRNA_103479	9.42512	11.3066	1.88677	3.69806	5.27e-07
hsa_circRNA_103605	9.97911	11.3049	1.38805	2.61725	0.00169111
hsa_circRNA_004239	9.60612	11.2939	1.53424	2.89635	3.96e-05
hsa_circRNA_100018	12.407	11.2933	-1.05077	2.07163	0.000935219
hsa_circRNA_102954	12.9744	11.2859	-1.62342	3.08104	0.000466216
hsa_circRNA_103507	12.9179	11.2788	-1.71915	3.29241	0.00162648
hsa_circRNA_005389	9.80825	11.2776	1.34892	2.54722	0.00129135
hsa_circRNA_001233	9.15124	11.2633	1.97529	3.93206	0.0015448
hsa_circRNA_101717	9.48769	11.2625	1.75124	3.36647	9.13e-06
hsa_circRNA_103505	12.887	11.2476	-1.70598	3.2625	0.000390857
hsa_circRNA_406652	9.96779	11.2404	1.36848	2.58199	0.0118829
hsa_circRNA_004046	10.0867	11.221	1.13446	2.19536	0.000356593
hsa_circRNA_102089	9.4637	11.212	1.69159	3.23013	4.1e-05
hsa_circRNA_101820	9.3194	11.1992	1.97622	3.9346	0.00483272
hsa_circRNA_003785	9.40491	11.1975	1.78004	3.43435	0.000133024
hsa_circRNA_405769	9.2677	11.1917	1.88766	3.70033	0.000360496
hsa_circRNA_100751	9.73131	11.1852	1.36845	2.58193	0.000693345
hsa_circRNA_104507	10.1543	11.1829	1.12085	2.17475	0.00145243
hsa_circRNA_102984	12.2352	11.1772	-1.09876	2.1417	0.0018162
hsa_circRNA_401636	9.76397	11.1653	1.39707	2.63365	7.44e-05
hsa_circRNA_091692	9.9527	11.1593	1.33659	2.52554	0.00261042
hsa_circRNA_044837	9.40119	11.1547	1.66626	3.17391	0.00707477
hsa_circRNA_100541	9.59787	11.1524	1.51797	2.86388	9.23e-05
hsa_circRNA_402755	9.70488	11.1334	1.41007	2.6575	0.00171728
hsa_circRNA_104412	9.84724	11.1326	1.34485	2.54003	0.00501729
hsa_circRNA_101275	9.99625	11.1321	1.08558	2.12222	0.000689895
hsa_circRNA_005629	9.43313	11.122	1.70317	3.25617	1.38e-05
hsa_circRNA_000480	9.5863	11.0931	1.46776	2.76591	0.00147607
hsa_circRNA_103290	9.6973	11.0671	1.34398	2.53851	0.00264591
hsa_circRNA_401965	9.3814	11.0668	1.71464	3.28215	3.63e-05
hsa_circRNA_100438	9.76383	11.06	1.34024	2.53193	0.00217192
hsa_circRNA_013177	9.52931	11.0533	1.60829	3.04889	0.00404722
hsa_circRNA_102611	14.2001	11.0509	-2.99151	7.95309	0.000415324
hsa_circRNA_051096	9.67964	11.0494	1.48776	2.80453	0.00262812
hsa_circRNA_101319	13.8234	11.0379	-2.67333	6.379	0.00071481
hsa_circRNA_101948	9.48947	11.0371	1.51217	2.85239	0.00026377
hsa_circRNA_089353	9.28865	11.0348	1.70555	3.26153	0.000659345
hsa_circRNA_051110	9.28659	11.0271	1.74631	3.35499	8.54e-05
hsa_circRNA_405760	9.60265	11.0131	1.41839	2.67286	0.00160571
hsa_circRNA_405571	12.1943	11.0041	-1.08742	2.12494	0.000777378
hsa_circRNA_101258	9.65786	10.994	1.31676	2.49106	2.48e-05
hsa_circRNA_100750	9.64139	10.9892	1.28149	2.43089	0.00935442
hsa_circRNA_405716	9.7763	10.9837	1.32326	2.50231	0.0247513
hsa_circRNA_100472	9.17359	10.9806	1.83652	3.57147	0.000793662
hsa_circRNA_102034	13.6318	10.98	-2.57633	5.9642	0.000121738
hsa_circRNA_102456	9.58238	10.9745	1.31492	2.48788	0.00455126
hsa_circRNA_404839	9.16732	10.9675	1.80815	3.50192	0.000720285
hsa_circRNA_000930	9.63326	10.9561	1.18902	2.27998	0.011716
hsa_circRNA_031393	9.33151	10.9499	1.51803	2.864	0.000894753
hsa_circRNA_001618	9.59736	10.9491	1.34098	2.53323	0.000591799
hsa_circRNA_405265	9.05251	10.9485	1.77679	3.42663	5e-05
hsa_circRNA_063226	9.6109	10.9391	1.27197	2.41492	0.001188
hsa_circRNA_092512	9.9121	10.9378	1.03342	2.04688	0.014898
hsa_circRNA_047713	9.47898	10.9324	1.34339	2.53746	2.39e-05
hsa_circRNA_104220	13.4409	10.929	-2.29075	4.89311	0.000160032
hsa_circRNA_009052	9.82364	10.9268	1.09427	2.13505	0.000745802
hsa_circRNA_405558	9.89996	10.923	1.06353	2.09003	0.00241819
hsa_circRNA_062898	9.85747	10.92	1.03249	2.04555	0.000533231
hsa_circRNA_403374	9.2554	10.9184	1.55953	2.94759	0.00016725
hsa_circRNA_005317	9.42331	10.9088	1.4617	2.75432	0.00266355
hsa_circRNA_081419	9.05477	10.9085	1.90904	3.7556	0.000131953
hsa_circRNA_059880	8.54508	10.8925	2.13429	4.3902	2.68e-05
hsa_circRNA_001588	12.0251	10.8878	-1.11769	2.16999	0.0141287
hsa_circRNA_101115	9.79779	10.8855	1.14905	2.21767	0.00197418
hsa_circRNA_020846	9.03153	10.8836	1.88637	3.69703	0.000151321
hsa_circRNA_000797	9.68833	10.8818	1.20224	2.30097	0.00179809
hsa_circRNA_104875	9.04585	10.8775	1.84624	3.59561	1.52e-05
hsa_circRNA_101911	8.85528	10.8762	1.86505	3.6428	0.00093484
hsa_circRNA_100269	8.90373	10.8682	1.8761	3.67081	0.000346636
hsa_circRNA_102028	13.4138	10.8593	-2.26372	4.80228	4.83e-05
hsa_circRNA_102543	9.45177	10.8438	1.42152	2.67867	0.00146527
hsa_circRNA_020704	9.44744	10.8374	1.39743	2.63431	0.000513955
hsa_circRNA_104598	9.17821	10.8346	1.61633	3.06594	0.000620349
hsa_circRNA_403328	9.6376	10.8299	1.15327	2.22417	0.00098381
hsa_circRNA_403250	9.54687	10.8271	1.1356	2.1971	0.00777704
hsa_circRNA_007046	9.47207	10.8196	1.34315	2.53704	0.000251639
hsa_circRNA_104586	9.02815	10.814	1.80704	3.49924	1.93e-05
hsa_circRNA_104616	9.72338	10.8122	1.04561	2.06424	0.000205618
hsa_circRNA_101833	11.9295	10.8118	-1.15285	2.22352	0.00312331
hsa_circRNA_102430	8.98836	10.8023	1.7296	3.31637	0.000630118
hsa_circRNA_049052	8.84228	10.7978	1.96017	3.89109	2.21e-05
hsa_circRNA_020845	9.10927	10.7947	1.71082	3.27346	0.00020152
hsa_circRNA_405741	8.59004	10.7866	2.12317	4.3565	1.69e-05
hsa_circRNA_404954	9.3874	10.7564	1.49433	2.81733	0.0273371
hsa_circRNA_406487	9.62336	10.7482	1.14861	2.217	0.0246032
hsa_circRNA_001788	12.8801	10.7372	-2.00762	4.02117	4.05e-05
hsa_circRNA_403715	9.5594	10.7335	1.09635	2.13812	0.00544141
hsa_circRNA_001005	9.45225	10.7331	1.26136	2.39722	0.00128268
hsa_circRNA_100139	9.49309	10.7267	1.10347	2.14871	0.000269769
hsa_circRNA_104889	9.60926	10.7262	1.18092	2.26722	0.000988246
hsa_circRNA_032602	9.13932	10.7183	1.61678	3.0669	0.000778374
hsa_circRNA_104349	8.70324	10.7151	1.78072	3.43598	0.00252615
hsa_circRNA_026445	9.32801	10.7128	1.41874	2.67352	0.00119855
hsa_circRNA_004121	9.15329	10.7053	1.48704	2.80314	0.00207605
hsa_circRNA_101313	9.21081	10.7043	1.4508	2.73359	0.000256144
hsa_circRNA_403587	8.94876	10.7017	1.72763	3.31183	0.000217247
hsa_circRNA_101138	9.27564	10.7011	1.47496	2.77975	0.000174543
hsa_circRNA_034804	9.56153	10.7007	1.04543	2.06399	0.0236545
hsa_circRNA_103809	11.8438	10.6966	-1.0619	2.08768	0.0047731
hsa_circRNA_402116	9.04287	10.6947	1.6489	3.13595	0.000208885
hsa_circRNA_101487	13.3535	10.692	-2.64455	6.25302	5.73e-07
hsa_circRNA_406422	13.3622	10.6819	-2.51781	5.72713	0.000474621
hsa_circRNA_025501	8.74408	10.6819	1.92696	3.80254	0.00011315
hsa_circRNA_100696	8.53838	10.6733	2.07297	4.20751	3.32e-05
hsa_circRNA_404524	8.96244	10.6729	1.77575	3.42417	0.00022053
hsa_circRNA_101696	8.86684	10.6526	1.82197	3.53565	0.000284754
hsa_circRNA_405567	8.45305	10.646	2.24063	4.72602	5.41e-06
hsa_circRNA_100021	9.29398	10.6432	1.35596	2.55967	0.000118156
hsa_circRNA_092454	8.88379	10.6242	1.82651	3.54679	0.0021337
hsa_circRNA_404317	9.17432	10.6217	1.48946	2.80783	0.000514366
hsa_circRNA_004843	9.32942	10.6141	1.27833	2.42558	0.000740038
hsa_circRNA_006578	9.02171	10.6063	1.5101	2.84829	0.000766105
hsa_circRNA_406587	8.79385	10.6015	1.79459	3.46917	0.000693603
hsa_circRNA_100069	9.14268	10.5967	1.47338	2.77671	0.000271185
hsa_circRNA_067327	8.89215	10.5935	1.75765	3.38147	0.000345117
hsa_circRNA_025500	9.58611	10.5906	1.11095	2.15988	0.0181517
hsa_circRNA_103783	11.8919	10.5835	-1.29509	2.45392	0.000845623
hsa_circRNA_100405	9.00559	10.5833	1.68243	3.20969	0.00382989
hsa_circRNA_404953	8.55371	10.5803	1.92221	3.79003	2.73e-05
hsa_circRNA_100849	9.05883	10.5742	1.46741	2.76525	5.11e-05
hsa_circRNA_102844	8.9725	10.5719	1.69215	3.23139	0.00025711
hsa_circRNA_051239	8.34148	10.5661	2.02702	4.07561	0.00439223
hsa_circRNA_402670	9.14536	10.5629	1.33528	2.52325	0.000262699
hsa_circRNA_400629	9.45957	10.5625	1.13865	2.20175	0.000440091
hsa_circRNA_400091	8.62087	10.5507	1.86217	3.63554	7.6e-05
hsa_circRNA_103555	12.3546	10.5464	-1.70918	3.26976	0.00226857
hsa_circRNA_405743	8.64073	10.5411	1.802	3.48703	0.000287586
hsa_circRNA_102974	12.4562	10.5208	-1.73983	3.33997	0.000858742
hsa_circRNA_003494	8.81143	10.5092	1.66825	3.17829	0.000262442
hsa_circRNA_102033	12.7933	10.5087	-2.14183	4.41322	3.33e-06
hsa_circRNA_001826	11.6033	10.5075	-1.01994	2.02783	0.000918326
hsa_circRNA_029930	9.32235	10.5019	1.20154	2.29986	2.38e-06
hsa_circRNA_102451	8.84175	10.5014	1.61923	3.0721	9.59e-05
hsa_circRNA_102928	11.8333	10.4992	-1.36283	2.5719	0.00135145
hsa_circRNA_102205	8.84197	10.4966	1.64608	3.12982	0.000183127
hsa_circRNA_000932	9.17753	10.4879	1.29501	2.45379	0.00029905
hsa_circRNA_010015	8.85358	10.4861	1.66475	3.17058	0.000359784
hsa_circRNA_087298	8.56923	10.4703	1.8191	3.52862	0.000169951
hsa_circRNA_102599	8.89994	10.4483	1.5834	2.99676	7.21e-05
hsa_circRNA_102731	9.22053	10.4321	1.16798	2.24698	6.5e-05
hsa_circRNA_038651	9.18731	10.4233	1.15121	2.221	0.00292299
hsa_circRNA_067209	9.13574	10.4178	1.25368	2.38448	0.0104092
hsa_circRNA_105017	9.12741	10.4092	1.31326	2.48502	0.00185053
hsa_circRNA_051800	8.46092	10.4051	1.90434	3.74337	0.000195384
hsa_circRNA_050607	8.71774	10.3849	1.57641	2.98226	2.55e-05
hsa_circRNA_102594	9.09823	10.3789	1.25203	2.38176	0.000391117
hsa_circRNA_104523	12.3104	10.3787	-1.7406	3.34174	0.00172895
hsa_circRNA_007333	8.02011	10.3737	2.18966	4.56198	0.00022479
hsa_circRNA_006941	8.59375	10.3658	1.79805	3.47749	0.000121732
hsa_circRNA_103560	13.4474	10.3647	-2.92064	7.57183	8.84e-05
hsa_circRNA_100420	8.99759	10.3609	1.33744	2.52702	0.00175267
hsa_circRNA_026399	9.09254	10.3548	1.31443	2.48704	0.000524753
hsa_circRNA_102991	8.39405	10.3509	1.90575	3.74703	2.95e-05
hsa_circRNA_049472	8.63755	10.3508	1.78	3.43426	0.00414186
hsa_circRNA_040773	8.88882	10.3484	1.52887	2.88559	0.00217021
hsa_circRNA_060184	8.00235	10.3456	2.36245	5.14242	3.43e-06
hsa_circRNA_103573	12.2995	10.3371	-1.78657	3.44994	6.36e-05
hsa_circRNA_000302	9.08396	10.3281	1.42732	2.68946	0.0307733
hsa_circRNA_100205	12.0601	10.3238	-1.6029	3.03754	4.62e-05
hsa_circRNA_034125	8.64185	10.3207	1.68638	3.21848	6.54e-05
hsa_circRNA_402019	8.84416	10.3186	1.43926	2.71181	1.6e-05
hsa_circRNA_061343	8.64424	10.3186	1.60852	3.0494	4.97e-06
hsa_circRNA_104414	8.63225	10.3182	1.60073	3.03297	3.62e-05
hsa_circRNA_083815	8.42792	10.3174	1.83573	3.56951	6.25e-05
hsa_circRNA_101419	8.49581	10.3171	1.73257	3.3232	8.04e-06
hsa_circRNA_102364	8.80582	10.3136	1.44548	2.72354	3.22e-05
hsa_circRNA_101434	13.335	10.3059	-2.85998	7.26007	1.59e-05
hsa_circRNA_405751	8.87801	10.3057	1.40267	2.6439	0.00042391
hsa_circRNA_045234	8.70845	10.3055	1.45067	2.73336	0.00145053
hsa_circRNA_068655	13.1718	10.2997	-2.64892	6.27199	0.00170026
hsa_circRNA_104395	8.76821	10.2962	1.60155	3.03469	0.00130865
hsa_circRNA_406326	8.21027	10.2922	2.06253	4.17719	9.26e-06
hsa_circRNA_001109	8.47608	10.2877	1.76036	3.38783	0.000109395
hsa_circRNA_000689	13.4874	10.2865	-3.0644	8.36521	8.54e-05
hsa_circRNA_406150	8.65074	10.2826	1.60219	3.03604	0.000167865
hsa_circRNA_100685	8.68674	10.271	1.52975	2.88736	8.16e-05
hsa_circRNA_102955	11.7946	10.2702	-1.48545	2.80004	0.000248292
hsa_circRNA_405016	8.40954	10.2601	1.80257	3.48841	7.64e-05
hsa_circRNA_000649	8.38671	10.2581	1.90727	3.75098	5.92e-05
hsa_circRNA_104917	8.96299	10.2556	1.24443	2.36924	0.00631335
hsa_circRNA_085946	8.821	10.2548	1.47003	2.77027	0.00236473
hsa_circRNA_026813	8.49073	10.2446	1.72303	3.30128	8.65e-05
hsa_circRNA_102158	13.398	10.2442	-2.94107	7.67978	1.93e-05
hsa_circRNA_012989	11.4257	10.2429	-1.01775	2.02476	0.00623006
hsa_circRNA_401403	8.37379	10.2367	1.92192	3.78928	6.87e-06
hsa_circRNA_406631	8.99408	10.2351	1.22335	2.33488	0.000807931
hsa_circRNA_050054	8.35103	10.2341	1.81615	3.5214	0.000153995
hsa_circRNA_102439	13.0742	10.2202	-2.50203	5.66483	0.000484862
hsa_circRNA_100108	8.3848	10.2137	1.79709	3.47517	4.37e-05
hsa_circRNA_052341	9.21148	10.2136	1.04037	2.05675	0.00259918
hsa_circRNA_100090	9.03171	10.2051	1.25053	2.37929	0.00186289
hsa_circRNA_051641	8.53824	10.1966	1.52133	2.87056	0.00343876
hsa_circRNA_402500	8.73379	10.1838	1.47238	2.7748	0.000227778
hsa_circRNA_001951	8.81461	10.1824	1.41615	2.66872	5.29e-05
hsa_circRNA_406091	8.45381	10.1779	1.68891	3.22413	0.00019422
hsa_circRNA_000931	8.10313	10.1778	1.99356	3.98219	3.47e-06
hsa_circRNA_406938	8.87666	10.1751	1.29598	2.45543	0.00209122
hsa_circRNA_102593	8.94837	10.173	1.23053	2.34653	0.00190049
hsa_circRNA_048801	8.47505	10.1701	1.70663	3.26398	2.61e-05
hsa_circRNA_026616	8.12276	10.1426	1.93613	3.82676	0.000272288
hsa_circRNA_012103	8.51288	10.1417	1.5192	2.86633	5.49e-05
hsa_circRNA_088744	8.50196	10.1362	1.6392	3.11492	3.82e-05
hsa_circRNA_405939	8.21856	10.1352	1.88868	3.70295	1.25e-06
hsa_circRNA_025196	7.9235	10.1285	2.12292	4.35574	6.1e-05
hsa_circRNA_011286	8.40575	10.1245	1.71658	3.28657	0.000129137
hsa_circRNA_103551	8.24193	10.1242	1.77815	3.42985	0.000501854
hsa_circRNA_048474	8.58476	10.1231	1.5973	3.02576	0.000550957
hsa_circRNA_101879	8.76001	10.1187	1.37437	2.59254	0.00018318
hsa_circRNA_104003	8.29216	10.1113	1.77558	3.42375	4.33e-05
hsa_circRNA_100876	8.50257	10.1076	1.63691	3.10998	1.4e-05
hsa_circRNA_001335	8.45024	10.1053	1.63925	3.11504	8.31e-05
hsa_circRNA_000410	8.52689	10.1046	1.55048	2.92915	6.85e-05
hsa_circRNA_100845	8.27374	10.1031	1.82962	3.55444	2.44e-05
hsa_circRNA_101876	8.17979	10.1019	1.82638	3.54645	0.000301439
hsa_circRNA_102715	9.01503	10.1003	1.17804	2.26269	0.0113089
hsa_circRNA_045788	8.59434	10.098	1.42697	2.68882	0.000601383
hsa_circRNA_401045	8.88212	10.0925	1.17418	2.25665	0.000441627
hsa_circRNA_100587	8.98655	10.0903	1.05597	2.07912	0.00206926
hsa_circRNA_405483	8.67552	10.0807	1.33311	2.51944	0.000984839
hsa_circRNA_104743	8.23276	10.0801	1.81057	3.5078	6.81e-07
hsa_circRNA_103691	12.5992	10.0744	-2.2968	4.91368	0.00032406
hsa_circRNA_400059	7.80593	10.0651	2.10352	4.29756	4.5e-05
hsa_circRNA_407270	8.20981	10.0616	1.79397	3.46767	0.00157822
hsa_circRNA_102550	8.93116	10.0603	1.1209	2.17483	0.000669937
hsa_circRNA_100164	8.01708	10.0601	1.94073	3.83901	1.57e-05
hsa_circRNA_406067	8.35594	10.0526	1.57955	2.98877	0.000123901
hsa_circRNA_100257	13.6288	10.0495	-3.3871	10.4621	0.000117859
hsa_circRNA_011977	8.45173	10.0477	1.5154	2.85879	0.00820329
hsa_circRNA_104439	8.14651	10.0467	1.84627	3.59569	2.28e-06
hsa_circRNA_103887	12.9078	10.0463	-2.73452	6.6554	1.37e-05
hsa_circRNA_104928	8.48157	10.0458	1.64314	3.12344	0.000393452
hsa_circRNA_103642	11.8395	10.044	-1.62401	3.0823	0.00243062
hsa_circRNA_009213	8.28586	10.0431	1.71108	3.27405	3.87e-05
hsa_circRNA_092388	8.08087	10.0405	1.77786	3.42918	0.0129309
hsa_circRNA_079743	8.15348	10.0374	1.80356	3.49079	9.62e-05
hsa_circRNA_001012	8.15755	10.0353	1.78825	3.45397	0.000785508
hsa_circRNA_014238	8.44485	10.0334	1.57288	2.97497	0.00193166
hsa_circRNA_406281	7.58867	10.0244	2.11578	4.33424	0.00383634
hsa_circRNA_405296	8.15075	10.022	1.64661	3.13097	0.00324705
hsa_circRNA_101446	11.9025	10.0165	-1.74056	3.34166	5.86e-06
hsa_circRNA_100177	8.39413	10.013	1.58142	2.99264	5.4e-05
hsa_circRNA_406780	8.18218	10.0074	1.78732	3.45172	5.83e-05
hsa_circRNA_402177	8.52959	10.0012	1.45492	2.74142	0.00570753
hsa_circRNA_406728	8.34835	10.0004	1.67473	3.1926	0.000189616
hsa_circRNA_031210	8.27158	9.99818	1.69036	3.22737	0.00108728
hsa_circRNA_100019	12.1335	9.99761	-1.88737	3.69961	0.000950191
hsa_circRNA_400229	8.1676	9.99169	1.78147	3.43777	8.53e-05
hsa_circRNA_101141	8.61261	9.97138	1.41096	2.65915	0.000185712
hsa_circRNA_400066	7.80122	9.96086	2.12783	4.37058	9.86e-07
hsa_circRNA_101713	11.0635	9.9537	-1.01457	2.02029	0.00103362
hsa_circRNA_101090	12.2299	9.95292	-2.24251	4.73221	1.96e-06
hsa_circRNA_009054	7.92573	9.95194	2.00226	4.00626	4.28e-05
hsa_circRNA_400380	7.67867	9.95145	2.15701	4.45989	3.82e-06
hsa_circRNA_402952	7.92842	9.9502	1.88081	3.68283	0.000152134
hsa_circRNA_000561	8.61688	9.94695	1.33281	2.51893	0.000101841
hsa_circRNA_104755	8.17314	9.94096	1.75246	3.36932	9.34e-05
hsa_circRNA_007237	8.73775	9.93876	1.19028	2.28197	0.00041189
hsa_circRNA_400418	8.57884	9.93646	1.25084	2.37981	0.000110852
hsa_circRNA_083948	8.36253	9.93602	1.53231	2.89249	0.000304365
hsa_circRNA_403967	7.76043	9.9355	2.08854	4.25319	1.21e-05
hsa_circRNA_004721	7.94431	9.93351	1.96923	3.91558	2.63e-05
hsa_circRNA_405311	8.87445	9.93215	1.01519	2.02117	0.000404174
hsa_circRNA_050998	8.75801	9.93101	1.23043	2.34637	0.0301612
hsa_circRNA_027719	7.98299	9.93025	2.0128	4.03565	0.000231009
hsa_circRNA_006153	8.71958	9.92542	1.30205	2.46579	0.00352398
hsa_circRNA_000694	8.1552	9.92392	1.65132	3.1412	0.000355081
hsa_circRNA_003261	11.3089	9.92367	-1.30321	2.46777	0.00186053
hsa_circRNA_404565	8.01255	9.91993	1.86927	3.65347	0.0003999
hsa_circRNA_405412	8.2269	9.91893	1.6976	3.24361	7.05e-06
hsa_circRNA_406338	8.39765	9.9185	1.34357	2.53778	0.00540812
hsa_circRNA_100860	8.48028	9.91832	1.54252	2.91302	0.00715256
hsa_circRNA_036272	8.02721	9.91225	1.88646	3.69728	3.47e-05
hsa_circRNA_071649	8.27296	9.91014	1.61033	3.05322	7.38e-05
hsa_circRNA_101975	8.10526	9.90954	1.83547	3.56887	1.21e-05
hsa_circRNA_104150	8.09152	9.90903	1.77927	3.43252	0.000265234
hsa_circRNA_008706	8.00185	9.90878	1.82552	3.54436	7.09e-06
hsa_circRNA_103148	8.38874	9.90871	1.53044	2.88874	0.000113434
hsa_circRNA_019646	8.69831	9.90295	1.16106	2.23622	0.00156906
hsa_circRNA_102097	11.7585	9.90073	-1.93298	3.81842	0.00824337
hsa_circRNA_101787	8.78045	9.89945	1.09755	2.13991	0.00163821
hsa_circRNA_023928	12.5206	9.89024	-2.58058	5.98182	1.36e-05
hsa_circRNA_404841	8.46691	9.88624	1.41568	2.66786	0.00135235
hsa_circRNA_102241	8.94095	9.88476	1.05123	2.07229	0.0337724
hsa_circRNA_405007	8.64632	9.88342	1.23885	2.36011	0.00144908
hsa_circRNA_059359	8.65809	9.88171	1.16568	2.2434	0.000265963
hsa_circRNA_002261	8.4914	9.88162	1.42601	2.68702	7.9e-06
hsa_circRNA_089863	8.70917	9.8794	1.219	2.32785	0.0277069
hsa_circRNA_401587	8.37666	9.87721	1.50142	2.83121	2.77e-05
hsa_circRNA_090920	8.48135	9.87417	1.45126	2.73446	0.00962567
hsa_circRNA_001169	8.1017	9.87095	1.71805	3.28991	0.0010042
hsa_circRNA_103285	8.03398	9.86638	1.80029	3.48291	2.38e-05
hsa_circRNA_104671	11.4533	9.86489	-1.63096	3.09719	0.00171132
hsa_circRNA_101220	8.21438	9.86168	1.54373	2.91548	7.16e-05
hsa_circRNA_104283	7.97083	9.85643	1.88469	3.69274	0.00040365
hsa_circRNA_007854	11.9013	9.84824	-2.00334	4.00928	0.00148007
hsa_circRNA_001257	7.99146	9.84046	1.81532	3.51938	0.000877432
hsa_circRNA_400034	8.40247	9.83665	1.45618	2.74381	0.000134838
hsa_circRNA_100896	11.3701	9.83659	-1.44289	2.71865	0.000243461
hsa_circRNA_102485	7.87796	9.836	1.68829	3.22274	0.00728219
hsa_circRNA_049948	8.38354	9.83473	1.51534	2.85867	0.0101499
hsa_circRNA_014213	8.35864	9.83437	1.41711	2.67049	0.00136565
hsa_circRNA_009366	8.10285	9.83358	1.63224	3.09995	3.31e-05
hsa_circRNA_025016	6.73819	9.82983	2.6769	6.39482	1.7e-05
hsa_circRNA_002626	8.11057	9.82809	1.62609	3.08675	0.000161907
hsa_circRNA_406961	7.77522	9.82384	2.01107	4.03081	5.95e-06
hsa_circRNA_406430	7.8029	9.80988	1.8857	3.69531	0.000601842
hsa_circRNA_103964	12.2708	9.79833	-2.47735	5.56875	3.67e-05
hsa_circRNA_104812	12.942	9.79632	-3.00299	8.01657	2.58e-06
hsa_circRNA_406729	8.35676	9.79276	1.31119	2.48146	0.000706644
hsa_circRNA_104411	11.1125	9.78841	-1.22747	2.34156	0.0025113
hsa_circRNA_083530	10.9137	9.78756	-1.06801	2.09653	0.00204108
hsa_circRNA_079201	8.13634	9.78593	1.58412	2.99826	4.36e-05
hsa_circRNA_100372	8.52731	9.78431	1.22409	2.33609	0.00789734
hsa_circRNA_104689	12.6601	9.78114	-2.76518	6.79832	0.000397932
hsa_circRNA_100109	8.44693	9.77947	1.3598	2.5665	0.00057361
hsa_circRNA_102085	8.19233	9.77714	1.54534	2.91873	0.000120565
hsa_circRNA_000928	8.22693	9.77597	1.4589	2.74899	0.00121475
hsa_circRNA_041041	8.47132	9.77526	1.35894	2.56497	0.0034981
hsa_circRNA_063811	8.17083	9.77332	1.51754	2.86302	0.000218052
hsa_circRNA_075900	7.63391	9.77072	1.93232	3.81669	0.000312585
hsa_circRNA_102353	12.4844	9.77034	-2.51794	5.72765	0.000592423
hsa_circRNA_100126	11.5572	9.76998	-1.68337	3.21177	0.000929587
hsa_circRNA_072837	8.77661	9.76756	1.01085	2.01509	0.00900615
hsa_circRNA_100013	12.227	9.76602	-2.26261	4.79859	0.0001976
hsa_circRNA_023143	7.46451	9.76063	2.23856	4.71927	5.79e-09
hsa_circRNA_029965	8.68191	9.75743	1.1397	2.20335	2.74e-05
hsa_circRNA_090446	8.49908	9.746	1.19673	2.29219	0.0110348
hsa_circRNA_100526	11.1794	9.74116	-1.26875	2.40952	0.00135721
hsa_circRNA_022920	8.32542	9.73766	1.33675	2.52581	0.00187651
hsa_circRNA_401170	8.36077	9.73623	1.37377	2.59147	0.000541926
hsa_circRNA_406329	7.65539	9.73509	1.96871	3.91418	0.000448092
hsa_circRNA_005925	8.13221	9.73217	1.59534	3.02166	0.000165245
hsa_circRNA_103457	8.21059	9.71688	1.51458	2.85716	4.14e-05
hsa_circRNA_091419	6.83188	9.71323	2.61867	6.14186	0.000340104
hsa_circRNA_102927	11.8859	9.71283	-2.23063	4.6934	5.78e-05
hsa_circRNA_008389	7.97827	9.71172	1.61017	3.05287	0.000206471
hsa_circRNA_088478	11.7972	9.71009	-1.96096	3.8932	0.000140094
hsa_circRNA_101139	8.04055	9.70632	1.64664	3.13103	6.7e-05
hsa_circRNA_405189	11.583	9.70388	-1.77011	3.4108	9.69e-06
hsa_circRNA_002082	11.4307	9.69158	-1.58122	2.99222	0.00484915
hsa_circRNA_102462	8.20141	9.68425	1.48084	2.79112	2.67e-05
hsa_circRNA_104499	8.17923	9.68388	1.43589	2.7055	0.000178546
hsa_circRNA_000129	8.18478	9.6811	1.49276	2.81428	0.000113005
hsa_circRNA_074216	8.31115	9.68083	1.41931	2.67458	0.000891972
hsa_circRNA_103060	8.14975	9.67922	1.55217	2.93258	1.32e-06
hsa_circRNA_100631	8.03409	9.67109	1.5905	3.01153	7.67e-07
hsa_circRNA_405836	7.9561	9.67024	1.87392	3.66526	0.0282191
hsa_circRNA_104728	8.26241	9.66955	1.386	2.61354	0.00105298
hsa_circRNA_102220	8.55512	9.66947	1.12862	2.1865	0.000621987
hsa_circRNA_104942	8.05657	9.66917	1.59072	3.012	6.84e-05
hsa_circRNA_400068	8.09813	9.66685	1.46639	2.76329	0.000697857
hsa_circRNA_029235	8.62843	9.66448	1.01432	2.01995	0.00368842
hsa_circRNA_100017	12.2512	9.65519	-2.41422	5.3303	0.000210142
hsa_circRNA_403472	8.20472	9.65298	1.39248	2.6253	0.000291202
hsa_circRNA_050212	8.11278	9.65125	1.57941	2.98847	0.00150292
hsa_circRNA_001795	8.2365	9.65119	1.4557	2.7429	0.00101532
hsa_circRNA_101760	8.48806	9.64978	1.14298	2.20837	0.000211839
hsa_circRNA_090969	7.70099	9.64567	1.93795	3.83161	4.5e-05
hsa_circRNA_104544	10.9353	9.64141	-1.33535	2.52337	0.00782013
hsa_circRNA_104690	12.425	9.63408	-2.70691	6.52923	0.000245238
hsa_circRNA_403103	8.21121	9.63361	1.42182	2.67923	0.000388855
hsa_circRNA_005213	7.70509	9.63208	1.94657	3.85456	0.000122959
hsa_circRNA_101003	7.84651	9.63203	1.76433	3.39715	7.44e-05
hsa_circRNA_101566	11.1505	9.62453	-1.43545	2.70467	0.00475594
hsa_circRNA_100387	8.24151	9.62286	1.33405	2.52109	1.92e-05
hsa_circRNA_103966	12.2843	9.61865	-2.63578	6.2151	3.67e-05
hsa_circRNA_102003	7.88725	9.61093	1.77925	3.43247	3.4e-05
hsa_circRNA_406167	8.05757	9.60734	1.56014	2.94882	0.00338733
hsa_circRNA_100363	11.8725	9.59511	-2.20514	4.61121	0.0017696
hsa_circRNA_009031	8.03739	9.58862	1.4826	2.79451	5.19e-06
hsa_circRNA_101492	8.05976	9.58703	1.49742	2.82338	0.000851876
hsa_circRNA_407041	8.27832	9.58632	1.33035	2.51463	0.00205388
hsa_circRNA_103521	12.7831	9.57948	-3.08176	8.46646	0.000267205
hsa_circRNA_001959	8.09713	9.57637	1.52213	2.87214	0.0013781
hsa_circRNA_101976	8.44338	9.5704	1.19926	2.29622	0.00321987
hsa_circRNA_004310	8.39105	9.57034	1.09087	2.13002	0.000702159
hsa_circRNA_100507	7.73631	9.56862	1.72093	3.29648	5.73e-05
hsa_circRNA_100014	10.787	9.56348	-1.01475	2.02055	0.0156743
hsa_circRNA_104158	7.7362	9.56085	1.74123	3.34321	0.000247408
hsa_circRNA_061170	7.76788	9.55709	1.67041	3.18305	8.28e-06
hsa_circRNA_092369	12.7911	9.54718	-3.19314	9.14598	1.49e-05
hsa_circRNA_057748	11.4181	9.54691	-1.76791	3.40561	0.00273958
hsa_circRNA_020923	8.20437	9.5427	1.31285	2.48433	0.000776327
hsa_circRNA_103561	8.19113	9.53647	1.3338	2.52066	0.000441954
hsa_circRNA_102118	8.28884	9.52953	1.17508	2.25805	0.00223103
hsa_circRNA_073009	7.13097	9.52741	2.27913	4.85386	0.00014124
hsa_circRNA_406309	7.57127	9.52659	1.87466	3.66715	0.000632745
hsa_circRNA_035426	7.60352	9.51998	1.8905	3.70764	7.82e-05
hsa_circRNA_104973	8.01213	9.51902	1.49439	2.81744	4.18e-05
hsa_circRNA_103364	10.6493	9.51782	-1.03341	2.04686	1.9e-05
hsa_circRNA_001208	7.83067	9.51255	1.72244	3.29995	0.00039267
hsa_circRNA_401068	7.6562	9.51224	1.74528	3.35259	2.65e-05
hsa_circRNA_103387	7.89683	9.50929	1.59385	3.01853	0.00010757
hsa_circRNA_101722	8.38781	9.50579	1.10499	2.15097	0.0015266
hsa_circRNA_103570	11.9743	9.50155	-2.25083	4.75958	4.16e-05
hsa_circRNA_102579	8.33672	9.49732	1.13933	2.20278	0.000199144
hsa_circRNA_402904	7.79076	9.49681	1.70557	3.26157	0.000117366
hsa_circRNA_101318	11.8971	9.49497	-2.28302	4.86696	0.000138976
hsa_circRNA_103736	12.2274	9.49401	-2.55867	5.89165	3.24e-05
hsa_circRNA_066113	8.12988	9.491	1.32679	2.50844	2.7e-05
hsa_circRNA_101951	8.46134	9.48587	1.04665	2.06573	0.00685859
hsa_circRNA_102576	7.51787	9.48494	1.86891	3.65257	7.42e-06
hsa_circRNA_102500	11.0677	9.48353	-1.48287	2.79503	0.00077381
hsa_circRNA_028143	8.37633	9.48261	1.08018	2.11429	0.00709489
hsa_circRNA_101638	11.3374	9.48066	-1.78208	3.43923	0.00109008
hsa_circRNA_102355	12.2789	9.47968	-2.54637	5.84161	0.000357995
hsa_circRNA_101559	10.9842	9.47784	-1.39363	2.62739	0.00018713
hsa_circRNA_102098	11.3423	9.46975	-1.92871	3.80715	0.00714391
hsa_circRNA_079973	7.71152	9.4665	1.7959	3.47233	0.000407356
hsa_circRNA_013141	8.09324	9.46432	1.38103	2.60455	0.000461743
hsa_circRNA_100916	10.9073	9.45621	-1.38757	2.61637	6.56e-05
hsa_circRNA_104503	8.00953	9.45175	1.55209	2.93241	0.00230565
hsa_circRNA_057753	12.1845	9.45138	-2.57322	5.95137	0.000384309
hsa_circRNA_102536	7.63319	9.45081	1.72357	3.30253	0.000501753
hsa_circRNA_101445	11.9777	9.44491	-2.33126	5.03246	0.000177471
hsa_circRNA_102610	12.8665	9.4443	-3.26332	9.6019	0.000179877
hsa_circRNA_401830	10.667	9.44111	-1.12236	2.17703	0.0105935
hsa_circRNA_402893	7.70475	9.43973	1.77317	3.41805	0.000175164
hsa_circRNA_100176	7.51781	9.43725	1.8581	3.62529	1.22e-05
hsa_circRNA_001205	7.72004	9.43242	1.70585	3.26221	0.000143271
hsa_circRNA_103110	11.1903	9.43044	-1.61363	3.06021	0.000872999
hsa_circRNA_102404	8.12443	9.42534	1.35129	2.55141	0.000454412
hsa_circRNA_102995	12.7893	9.42449	-3.23535	9.41753	6.13e-06
hsa_circRNA_104532	12.3335	9.42387	-2.74497	6.70376	0.0010377
hsa_circRNA_104758	11.335	9.42099	-1.82414	3.54095	9.53e-05
hsa_circRNA_002643	7.88016	9.4208	1.42486	2.68489	0.00173575
hsa_circRNA_103890	8.37426	9.41697	1.05526	2.07809	0.00142129
hsa_circRNA_101349	12.6629	9.4145	-3.004	8.02221	9.01e-05
hsa_circRNA_104038	8.2727	9.41175	1.17691	2.26093	0.00402163
hsa_circRNA_101484	11.1971	9.40953	-1.68126	3.20707	0.00075521
hsa_circRNA_104521	7.64126	9.40157	1.77374	3.4194	0.000451368
hsa_circRNA_008077	7.71666	9.39824	1.68912	3.22459	0.00010364
hsa_circRNA_406829	7.11113	9.39715	1.99144	3.97633	0.0021855
hsa_circRNA_100861	7.96336	9.39509	1.45343	2.73858	1.09e-05
hsa_circRNA_104997	7.82775	9.39311	1.55377	2.93583	0.000196575
hsa_circRNA_404736	7.06407	9.39075	2.18226	4.53864	3.14e-05
hsa_circRNA_103033	8.0926	9.38981	1.2654	2.40394	2.42e-05
hsa_circRNA_038901	7.63052	9.3875	1.79393	3.46759	1.51e-05
hsa_circRNA_102554	7.7044	9.38691	1.69514	3.23809	1.11e-05
hsa_circRNA_103112	12.3842	9.38559	-2.90218	7.47555	0.000100918
hsa_circRNA_102457	8.0124	9.38168	1.39553	2.63085	0.000321632
hsa_circRNA_103784	7.81581	9.38146	1.49736	2.82325	0.000187681
hsa_circRNA_102570	8.03172	9.37994	1.39674	2.63307	0.00196284
hsa_circRNA_100332	7.9365	9.37857	1.47612	2.782	0.00265902
hsa_circRNA_074657	7.67753	9.37843	1.70651	3.2637	2.86e-06
hsa_circRNA_406280	10.6463	9.3779	-1.14893	2.2175	0.00750172
hsa_circRNA_049851	8.02338	9.37189	1.36441	2.5747	0.00111725
hsa_circRNA_104895	7.27968	9.37184	1.99116	3.97557	0.000118155
hsa_circRNA_406087	7.67604	9.36459	1.70969	3.27091	4.13e-05
hsa_circRNA_100391	7.90282	9.36288	1.41828	2.67267	7.72e-06
hsa_circRNA_104710	8.18024	9.36188	1.06501	2.09218	0.00107489
hsa_circRNA_031235	12.6112	9.36089	-3.07	8.39773	0.000282322
hsa_circRNA_101317	10.5108	9.35978	-1.10939	2.15755	0.0111348
hsa_circRNA_048148	7.1714	9.35832	2.01951	4.05447	0.0051358
hsa_circRNA_008349	8.09676	9.35784	1.1462	2.2133	0.00111366
hsa_circRNA_001498	7.82029	9.35637	1.60171	3.03502	0.000300342
hsa_circRNA_051640	7.76716	9.35379	1.40167	2.64207	0.00179532
hsa_circRNA_404501	7.62801	9.35256	1.66121	3.16281	4.41e-05
hsa_circRNA_101821	11.6931	9.34523	-2.07989	4.22776	0.000434479
hsa_circRNA_104368	7.82458	9.34409	1.52517	2.87822	1.29e-05
hsa_circRNA_001197	7.35495	9.34035	1.92976	3.80992	0.000217702
hsa_circRNA_103442	8.12305	9.33995	1.27995	2.42831	0.0151767
hsa_circRNA_103668	11.2502	9.33937	-1.71211	3.27639	0.000174544
hsa_circRNA_400527	7.23568	9.33934	2.01349	4.03757	1.95e-06
hsa_circRNA_102590	7.88214	9.33572	1.523	2.87388	0.00011296
hsa_circRNA_063681	7.75071	9.33157	1.6616	3.16367	0.00074426
hsa_circRNA_102396	8.04898	9.33012	1.26194	2.39818	0.00038828
hsa_circRNA_001871	7.98207	9.32983	1.27822	2.4254	1.78e-05
hsa_circRNA_103017	11.2432	9.32825	-1.83441	3.56626	0.00310954
hsa_circRNA_101354	7.60144	9.32503	1.6392	3.11493	8.65e-05
hsa_circRNA_104355	7.42178	9.32454	1.86394	3.63999	0.00134713
hsa_circRNA_000624	7.8282	9.32103	1.52564	2.87914	0.000219198
hsa_circRNA_103096	12.4531	9.32013	-2.90605	7.49562	0.000683465
hsa_circRNA_406344	7.71183	9.31866	1.66285	3.16641	0.000166754
hsa_circRNA_004738	7.68113	9.31755	1.58472	2.9995	2.6e-05
hsa_circRNA_100207	7.77725	9.31709	1.5436	2.91521	8.4e-06
hsa_circRNA_001741	7.79784	9.3163	1.5171	2.86215	0.000593915
hsa_circRNA_407279	8.30026	9.31629	1.02134	2.0298	0.00100065
hsa_circRNA_022358	7.30373	9.31117	1.90298	3.73986	0.000267865
hsa_circRNA_104090	8.27061	9.30799	1.03807	2.05348	0.000389667
hsa_circRNA_042992	11.159	9.30785	-1.93316	3.8189	0.0125508
hsa_circRNA_005575	7.94327	9.29436	1.13735	2.19976	0.01112
hsa_circRNA_000350	7.58784	9.29421	1.60709	3.04636	5.72e-05
hsa_circRNA_100364	11.5635	9.29309	-2.13955	4.40625	0.00137361
hsa_circRNA_101128	12.2596	9.29075	-2.9498	7.72644	1.22e-05
hsa_circRNA_089652	7.57202	9.28711	1.58962	3.00969	0.00014935
hsa_circRNA_101232	12.3818	9.28603	-2.97799	7.87888	3.62e-06
hsa_circRNA_006002	7.69966	9.28476	1.44605	2.7246	4.66e-05
hsa_circRNA_406724	11.3857	9.27118	-1.99369	3.98254	0.000249798
hsa_circRNA_100853	7.50452	9.26546	1.76322	3.39455	1.54e-05
hsa_circRNA_102831	11.8233	9.25572	-2.46166	5.50849	3.08e-05
hsa_circRNA_103571	12.4251	9.25515	-2.99204	7.95599	1.12e-05
hsa_circRNA_045751	7.46188	9.24842	1.79686	3.47463	3.73e-05
hsa_circRNA_405383	7.88672	9.24821	1.33733	2.52683	0.000370055
hsa_circRNA_104052	12.4529	9.24669	-3.19448	9.15448	0.00029939
hsa_circRNA_402126	8.09437	9.24203	1.17848	2.26338	0.00496392
hsa_circRNA_044235	6.81525	9.24144	2.25864	4.78542	0.000913785
hsa_circRNA_000590	7.51831	9.23943	1.70899	3.26931	5.81e-05
hsa_circRNA_018225	8.1338	9.23561	1.02505	2.03503	0.0315125
hsa_circRNA_104665	8.23646	9.2317	1.02124	2.02966	0.000548217
hsa_circRNA_068478	7.74846	9.23049	1.47283	2.77566	0.000167184
hsa_circRNA_101958	10.3905	9.22909	-1.11302	2.16297	0.0155926
hsa_circRNA_001229	7.14406	9.22197	2.02182	4.06095	0.000218882
hsa_circRNA_101378	7.85759	9.22137	1.39069	2.62205	0.0001835
hsa_circRNA_101216	7.14756	9.21501	1.93725	3.82976	0.00180141
hsa_circRNA_104165	7.75528	9.21448	1.39469	2.62932	0.000554291
hsa_circRNA_007054	10.9668	9.2143	-1.65109	3.14072	0.000602828
hsa_circRNA_101841	7.765	9.21237	1.37351	2.59101	0.0027901
hsa_circRNA_401057	7.66133	9.21165	1.42032	2.67644	0.000811582
hsa_circRNA_101857	7.45291	9.21095	1.68581	3.2172	6.55e-05
hsa_circRNA_041100	8.0348	9.21014	1.15951	2.23382	0.008443
hsa_circRNA_402803	8.02368	9.20768	1.15723	2.23029	0.00528238
hsa_circRNA_101310	10.4018	9.20386	-1.01109	2.01543	0.0236768
hsa_circRNA_405796	7.93923	9.20108	1.23226	2.34935	0.000430571
hsa_circRNA_401437	7.14499	9.20078	2.01805	4.05037	2.38e-05
hsa_circRNA_028072	11.831	9.20026	-2.52451	5.75376	5.34e-06
hsa_circRNA_008874	10.6815	9.19909	-1.30679	2.4739	0.0210157
hsa_circRNA_001676	7.55268	9.19899	1.59401	3.01887	0.000520047
hsa_circRNA_102817	7.27959	9.19763	1.8394	3.57861	6e-05
hsa_circRNA_102929	11.2646	9.1951	-2.0589	4.16668	0.000503206
hsa_circRNA_051348	8.07245	9.19311	1.04845	2.06831	0.000292055
hsa_circRNA_405755	7.45291	9.19071	1.80464	3.49341	4.29e-05
hsa_circRNA_104423	7.463	9.18944	1.72864	3.31416	0.000215308
hsa_circRNA_407275	7.14299	9.18644	1.98811	3.96716	6.13e-06
hsa_circRNA_024144	7.28994	9.18606	1.80037	3.48311	0.00106638
hsa_circRNA_000186	7.21272	9.18531	1.96409	3.90168	9.79e-05
hsa_circRNA_101533	11.9531	9.18466	-2.58675	6.00744	0.000533146
hsa_circRNA_001921	11.1532	9.18273	-1.89014	3.70671	0.000322603
hsa_circRNA_103619	10.9375	9.18184	-1.61159	3.05588	0.00145018
hsa_circRNA_403961	11.5825	9.18138	-2.16834	4.49504	9.64e-05
hsa_circRNA_014306	7.60507	9.17956	1.56183	2.95228	0.000418808
hsa_circRNA_009127	6.79283	9.17706	2.32705	5.01779	4.7e-05
hsa_circRNA_401433	7.54565	9.17681	1.62705	3.08881	0.000637983
hsa_circRNA_032377	8.11068	9.17651	1.08285	2.11822	0.00238619
hsa_circRNA_406136	7.55474	9.17601	1.46452	2.75972	0.000536968
hsa_circRNA_059571	7.54621	9.17527	1.66217	3.16491	0.00217036
hsa_circRNA_406180	7.91963	9.17034	1.23264	2.34997	0.000849793
hsa_circRNA_032475	7.55384	9.16826	1.52235	2.87259	0.000189875
hsa_circRNA_005671	10.2494	9.16823	-1.02669	2.03735	0.000600818
hsa_circRNA_000221	7.72515	9.16675	1.41856	2.67319	7.35e-06
hsa_circRNA_036088	7.30088	9.16607	1.87705	3.67323	0.000121115
hsa_circRNA_084553	7.80188	9.16464	1.23332	2.35107	0.00213926
hsa_circRNA_006345	10.9779	9.16455	-1.70241	3.25444	0.000276131
hsa_circRNA_100944	7.55237	9.16299	1.55225	2.93274	1.46e-05
hsa_circRNA_100585	10.7084	9.16257	-1.4964	2.82138	0.000183673
hsa_circRNA_103529	7.76852	9.16086	1.36012	2.56707	3.51e-05
hsa_circRNA_014737	7.58446	9.15911	1.53532	2.89853	5.07e-05
hsa_circRNA_010058	11.0228	9.15272	-1.71252	3.27733	0.00313683
hsa_circRNA_402089	7.70728	9.15164	1.40255	2.64369	0.00391986
hsa_circRNA_000276	7.57619	9.1486	1.5554	2.93916	2.99e-05
hsa_circRNA_100759	7.08955	9.14276	1.73778	3.33521	0.0104882
hsa_circRNA_104775	11.7408	9.14228	-2.37678	5.19377	7.47e-05
hsa_circRNA_400053	7.63681	9.1337	1.41774	2.67167	0.000801074
hsa_circRNA_103552	11.0426	9.13041	-1.75326	3.37119	0.000219172
hsa_circRNA_100836	7.27015	9.12939	1.91077	3.7601	6.68e-06
hsa_circRNA_000368	10.4862	9.12853	-1.268	2.40828	0.00296764
hsa_circRNA_406937	7.05333	9.12447	1.89542	3.72031	0.0022837
hsa_circRNA_067718	7.51933	9.12376	1.61575	3.06471	3.92e-05
hsa_circRNA_100334	7.77063	9.11935	1.37296	2.59001	0.000497104
hsa_circRNA_404905	8.14896	9.11824	1.01541	2.02148	0.0402145
hsa_circRNA_102321	7.48274	9.11771	1.63132	3.09796	0.00011709
hsa_circRNA_008702	10.7691	9.11535	-1.43124	2.69679	0.000428821
hsa_circRNA_101089	7.08424	9.1125	1.98816	3.96732	3.97e-05
hsa_circRNA_044014	7.50006	9.11248	1.53871	2.90536	2.37e-06
hsa_circRNA_405133	7.75338	9.10912	1.34681	2.54349	5.05e-05
hsa_circRNA_404994	7.13021	9.10677	1.747	3.35659	0.000581247
hsa_circRNA_104238	7.38174	9.10479	1.66459	3.17022	1.74e-05
hsa_circRNA_004100	7.59772	9.1011	1.42048	2.67675	1.41e-05
hsa_circRNA_404460	7.76496	9.09917	1.38482	2.6114	0.000239241
hsa_circRNA_004491	11.5875	9.0922	-2.34481	5.07993	0.000111381
hsa_circRNA_102144	11.5063	9.09067	-2.31565	4.97828	6.69e-05
hsa_circRNA_103356	7.59042	9.08787	1.4702	2.77061	2.13e-05
hsa_circRNA_000763	6.93847	9.08357	1.97085	3.91999	0.00901292
hsa_circRNA_401763	12.0761	9.08342	-2.81954	7.05938	1.5e-05
hsa_circRNA_100899	6.77938	9.06993	2.24404	4.73721	6.22e-05
hsa_circRNA_104774	11.6752	9.06928	-2.3695	5.16762	0.000111259
hsa_circRNA_406718	7.92122	9.06801	1.13147	2.19082	0.00415604
hsa_circRNA_103191	10.8414	9.06795	-1.57754	2.9846	0.00634077
hsa_circRNA_016363	7.49324	9.06517	1.4577	2.7467	0.00022394
hsa_circRNA_027046	7.52953	9.06062	1.57162	2.97239	1.2e-05
hsa_circRNA_100354	11.9988	9.05736	-2.82064	7.06477	1.63e-05
hsa_circRNA_009154	12.1309	9.05557	-2.96435	7.80473	3.88e-05
hsa_circRNA_402217	7.11279	9.05501	1.84155	3.58395	6.44e-05
hsa_circRNA_104495	7.69982	9.05495	1.31893	2.4948	0.00120141
hsa_circRNA_104148	7.73651	9.05328	1.28214	2.43199	0.000444369
hsa_circRNA_103689	7.60668	9.05214	1.51028	2.84865	0.00156852
hsa_circRNA_008323	7.54601	9.05127	1.47797	2.78556	7.33e-05
hsa_circRNA_103036	7.67137	9.04479	1.44269	2.71827	0.000123967
hsa_circRNA_102341	11.5067	9.03852	-2.31362	4.9713	0.000295912
hsa_circRNA_000543	11.5121	9.03553	-2.5203	5.73702	0.000361655
hsa_circRNA_405538	6.99103	9.02954	1.93276	3.81785	0.000254635
hsa_circRNA_103355	7.31115	9.02706	1.67022	3.18264	1.08e-05
hsa_circRNA_102153	11.7643	9.02624	-2.65686	6.30659	6.48e-06
hsa_circRNA_103107	7.40993	9.02423	1.43292	2.69993	0.00390798
hsa_circRNA_001312	12.033	9.02381	-2.79053	6.91886	7.33e-05
hsa_circRNA_102784	7.93842	9.01748	1.06302	2.0893	0.000509109
hsa_circRNA_002194	10.2974	9.01728	-1.16963	2.24953	0.00413875
hsa_circRNA_405776	7.43532	9.01454	1.51913	2.86619	2.87e-05
hsa_circRNA_100445	7.98979	9.01292	1.04018	2.05648	0.00275517
hsa_circRNA_100130	7.42909	9.01163	1.5071	2.84238	7.46e-05
hsa_circRNA_068765	7.66396	9.00538	1.35588	2.55953	0.000212438
hsa_circRNA_406457	7.08737	9.00171	1.92015	3.78462	1.53e-05
hsa_circRNA_023828	7.74899	9.00161	1.36901	2.58293	0.00374263
hsa_circRNA_102211	7.81958	8.99909	1.15189	2.22205	0.00105053
hsa_circRNA_006005	7.85852	8.99757	1.14026	2.20421	0.0105494
hsa_circRNA_100571	7.62633	8.99711	1.37851	2.59999	2.35e-05
hsa_circRNA_103910	7.57801	8.99384	1.4134	2.66365	9.6e-05
hsa_circRNA_101565	10.1657	8.99131	-1.26532	2.40381	0.00685802
hsa_circRNA_008913	7.52208	8.99087	1.36566	2.57694	0.00265525
hsa_circRNA_087631	7.03938	8.99066	1.79683	3.47457	6.25e-05
hsa_circRNA_038635	6.8601	8.98631	1.99608	3.98915	0.000791359
hsa_circRNA_007803	10.5912	8.98505	-1.48335	2.79597	0.000385652
hsa_circRNA_037205	7.7918	8.98409	1.11718	2.16923	5.95e-05
hsa_circRNA_103308	7.33288	8.9827	1.60648	3.04507	1.21e-05
hsa_circRNA_103309	7.04961	8.97962	1.75133	3.36669	0.00022365
hsa_circRNA_000181	7.28975	8.97144	1.62057	3.07496	2.83e-06
hsa_circRNA_086684	7.26073	8.97035	1.68093	3.20635	3.44e-05
hsa_circRNA_059104	7.37403	8.96821	1.59456	3.02003	0.00026519
hsa_circRNA_104522	11.6303	8.96086	-2.4232	5.36358	4.84e-05
hsa_circRNA_045842	7.6435	8.96043	1.24035	2.36256	7.62e-05
hsa_circRNA_100311	10.9319	8.95895	-1.93476	3.82314	0.00023501
hsa_circRNA_005158	10.1656	8.95866	-1.08483	2.12112	0.00606664
hsa_circRNA_100527	10.4338	8.95442	-1.32651	2.50795	0.000345716
hsa_circRNA_007881	10.6717	8.95323	-1.69211	3.23129	0.000291001
hsa_circRNA_103149	11.9414	8.95188	-2.82204	7.07161	0.00103791
hsa_circRNA_019442	7.23957	8.95002	1.65115	3.14084	8.13e-05
hsa_circRNA_406097	10.8859	8.947	-1.82049	3.53201	0.00117067
hsa_circRNA_103510	7.48392	8.94009	1.4245	2.68421	0.000107482
hsa_circRNA_104595	7.39771	8.92828	1.52648	2.88082	8.11e-05
hsa_circRNA_003608	11.7627	8.92598	-2.60233	6.07266	0.000575209
hsa_circRNA_019252	7.51544	8.92451	1.6309	3.09706	0.0385398
hsa_circRNA_046507	6.96218	8.92288	1.85079	3.60697	1.95e-05
hsa_circRNA_084725	7.16277	8.92086	1.78441	3.44477	0.000147767
hsa_circRNA_407100	7.66153	8.91869	1.33167	2.51694	0.000822918
hsa_circRNA_021493	7.25212	8.9153	1.63308	3.10175	2.53e-06
hsa_circRNA_101756	7.05573	8.9144	1.78797	3.45329	5.25e-06
hsa_circRNA_001535	10.074	8.91405	-1.03347	2.04694	0.0290964
hsa_circRNA_080646	7.01188	8.912	1.81971	3.5301	3.9e-05
hsa_circRNA_029031	6.97812	8.90929	1.8036	3.49091	0.000182517
hsa_circRNA_104924	6.66903	8.89536	2.16495	4.4845	1.21e-05
hsa_circRNA_403867	7.26522	8.89161	1.63792	3.11217	8.97e-06
hsa_circRNA_103363	10.3135	8.88572	-1.33223	2.51792	1.02e-06
hsa_circRNA_103762	11.5663	8.88274	-2.55329	5.8697	0.000453866
hsa_circRNA_002044	10.5041	8.88088	-1.60317	3.0381	0.000391631
hsa_circRNA_102895	10.3103	8.87874	-1.39753	2.63449	0.000100838
hsa_circRNA_008046	7.73682	8.87578	1.04737	2.06677	0.0119993
hsa_circRNA_100915	10.9425	8.87428	-1.93885	3.83399	6.9e-06
hsa_circRNA_405440	10.3293	8.86885	-1.3847	2.61118	4.21e-05
hsa_circRNA_003806	7.3887	8.86676	1.46874	2.76779	0.000284634
hsa_circRNA_012592	7.78565	8.85709	1.03386	2.04749	0.00189073
hsa_circRNA_102393	7.54149	8.85476	1.40386	2.64609	0.00119969
hsa_circRNA_028861	7.35923	8.85426	1.62643	3.08747	0.00178436
hsa_circRNA_101854	11.7109	8.85231	-2.74246	6.69211	5.91e-06
hsa_circRNA_404578	7.40936	8.85004	1.36519	2.57611	1.62e-05
hsa_circRNA_402437	7.4807	8.84623	1.40359	2.6456	0.000309133
hsa_circRNA_104435	10.4337	8.84509	-1.5512	2.93061	0.00167565
hsa_circRNA_005704	10.4703	8.84403	-1.45617	2.74378	9.49e-05
hsa_circRNA_101057	7.82038	8.84367	1.00794	2.01104	8.48e-05
hsa_circRNA_101315	7.12493	8.84075	1.60188	3.03538	6.77e-05
hsa_circRNA_057360	7.5378	8.83138	1.21495	2.32133	0.000116951
hsa_circRNA_101661	7.25762	8.82653	1.56365	2.956	4.44e-05
hsa_circRNA_103273	7.34596	8.82494	1.52936	2.88658	0.000127506
hsa_circRNA_002042	7.41522	8.82175	1.39869	2.63662	0.000295183
hsa_circRNA_406044	7.31788	8.82012	1.44354	2.71987	1.06e-05
hsa_circRNA_006008	11.0169	8.81928	-2.05946	4.1683	3.68e-05
hsa_circRNA_004237	7.73956	8.81803	1.11903	2.17201	0.00138545
hsa_circRNA_103390	7.24358	8.81671	1.4823	2.79394	5.56e-05
hsa_circRNA_077296	7.25835	8.81639	1.43634	2.70633	0.00756456
hsa_circRNA_405260	7.26778	8.81499	1.5141	2.85621	0.000400603
hsa_circRNA_100623	7.8419	8.81136	1.02149	2.03001	0.0036353
hsa_circRNA_003524	7.65711	8.80879	1.08273	2.11804	0.0045142
hsa_circRNA_103845	6.78982	8.80788	1.96566	3.9059	0.000128925
hsa_circRNA_032236	7.33778	8.80322	1.44945	2.73104	4.47e-05
hsa_circRNA_000967	7.34266	8.80284	1.51139	2.85085	0.0186333
hsa_circRNA_102030	11.6659	8.80021	-2.66424	6.33892	2.52e-05
hsa_circRNA_102011	7.66179	8.7971	1.14508	2.21158	0.000709369
hsa_circRNA_061376	7.44952	8.79325	1.32557	2.50632	5.01e-05
hsa_circRNA_059914	11.1541	8.79295	-2.3073	4.94955	0.00864685
hsa_circRNA_037422	7.17838	8.79243	1.5322	2.89227	1.74e-06
hsa_circRNA_104807	11.349	8.79118	-2.42424	5.36748	4.33e-05
hsa_circRNA_101040	6.7725	8.78863	1.96605	3.90697	1.18e-06
hsa_circRNA_407049	7.43025	8.78613	1.28854	2.44281	4.98e-05
hsa_circRNA_101215	7.24118	8.78219	1.50219	2.83273	5.56e-05
hsa_circRNA_102434	6.98822	8.78179	1.77735	3.42796	8.82e-06
hsa_circRNA_104644	7.00834	8.77884	1.64323	3.12364	9.82e-06
hsa_circRNA_104611	10.7627	8.77635	-1.83936	3.57851	0.00072716
hsa_circRNA_101520	11.2295	8.77071	-2.33528	5.0465	8.42e-05
hsa_circRNA_080289	7.54325	8.77019	1.21839	2.32687	0.000591878
hsa_circRNA_404577	7.3912	8.76999	1.2892	2.44392	0.000806011
hsa_circRNA_103237	6.848	8.76863	1.79371	3.46706	5.05e-07
hsa_circRNA_406295	7.22152	8.76825	1.47693	2.78355	0.000155978
hsa_circRNA_103103	7.76274	8.76795	1.04195	2.05901	0.00497983
hsa_circRNA_001015	6.92976	8.76677	1.77435	3.42085	3.19e-05
hsa_circRNA_407247	7.30851	8.76203	1.4388	2.71096	9.55e-06
hsa_circRNA_101536	7.38969	8.75059	1.3287	2.51177	0.000150229
hsa_circRNA_018405	11.6403	8.74713	-2.74813	6.71845	7.46e-05
hsa_circRNA_404984	7.53286	8.74641	1.11396	2.16439	0.00298293
hsa_circRNA_102441	7.38621	8.74422	1.38382	2.60958	0.00118273
hsa_circRNA_007313	11.8078	8.74302	-2.78408	6.888	0.000118671
hsa_circRNA_009130	7.20331	8.74231	1.48647	2.80202	0.000106328
hsa_circRNA_101835	9.89565	8.73902	-1.1052	2.15129	0.00191461
hsa_circRNA_104911	10.8524	8.7388	-1.98316	3.95358	0.00089383
hsa_circRNA_100529	7.56715	8.73835	1.13344	2.19381	0.000263092
hsa_circRNA_076057	7.15747	8.73825	1.54221	2.91241	0.000148449
hsa_circRNA_400698	6.55642	8.73625	2.24982	4.75624	0.00136769
hsa_circRNA_406022	11.3767	8.73521	-2.50735	5.68576	0.000164331
hsa_circRNA_405527	7.62741	8.73412	1.02391	2.03342	0.036989
hsa_circRNA_102334	7.00734	8.73308	1.66977	3.18164	2.8e-05
hsa_circRNA_404850	7.52956	8.73185	1.28645	2.43928	0.0123339
hsa_circRNA_101887	7.38154	8.73058	1.34931	2.54791	0.000409889
hsa_circRNA_069714	11.6193	8.72971	-2.73796	6.67129	1.97e-05
hsa_circRNA_018086	10.4497	8.7296	-1.69134	3.22957	0.000921186
hsa_circRNA_100127	9.97293	8.72784	-1.20168	2.30007	0.00108194
hsa_circRNA_406193	7.6621	8.7245	1.11641	2.16807	0.00730626
hsa_circRNA_407224	6.75844	8.72162	1.90131	3.73553	2.36e-05
hsa_circRNA_100227	10.0292	8.71855	-1.23281	2.35024	0.00156161
hsa_circRNA_010027	6.77919	8.71553	1.75543	3.37626	5.96e-05
hsa_circRNA_070739	7.27529	8.71531	1.28107	2.43018	0.0119829
hsa_circRNA_103884	10.4905	8.71222	-1.60061	3.03271	0.000651313
hsa_circRNA_004611	7.64096	8.70961	1.12716	2.18429	0.000123428
hsa_circRNA_104299	7.66787	8.70924	1.02738	2.03831	0.00205445
hsa_circRNA_400074	7.03904	8.70859	1.62014	3.07404	9.42e-05
hsa_circRNA_400455	7.41367	8.70643	1.26751	2.40746	0.000366774
hsa_circRNA_006471	7.50591	8.70638	1.23137	2.3479	0.00115594
hsa_circRNA_001123	11.0471	8.70234	-2.19316	4.57306	0.000276571
hsa_circRNA_100566	11.3895	8.70023	-2.62245	6.15793	5.07e-05
hsa_circRNA_407059	7.18133	8.69386	1.46676	2.76401	2.18e-05
hsa_circRNA_406860	7.24707	8.69102	1.43373	2.70145	2.68e-05
hsa_circRNA_012287	7.48616	8.68979	1.18707	2.2769	0.000853166
hsa_circRNA_029021	7.52223	8.68501	1.10292	2.1479	0.000127713
hsa_circRNA_402002	7.65674	8.68301	1.00542	2.00753	0.000385664
hsa_circRNA_103769	9.86227	8.68258	-1.13795	2.20069	0.00674251
hsa_circRNA_073927	6.82494	8.68123	1.77963	3.43339	2.95e-05
hsa_circRNA_091840	7.49677	8.6797	1.12486	2.1808	0.00135251
hsa_circRNA_100073	7.26454	8.67875	1.49444	2.81754	3.9e-06
hsa_circRNA_015081	6.98091	8.67439	1.55247	2.93318	0.00488732
hsa_circRNA_104759	10.1519	8.67438	-1.51995	2.86782	0.000117619
hsa_circRNA_030101	7.38836	8.6737	1.23437	2.35278	8.51e-06
hsa_circRNA_102737	12.0705	8.67126	-3.22096	9.32409	5.24e-05
hsa_circRNA_405094	7.50517	8.67116	1.04918	2.06935	0.00134988
hsa_circRNA_001108	7.107	8.66874	1.53745	2.90281	7.05e-05
hsa_circRNA_101347	10.9596	8.66873	-2.09274	4.26557	0.000147207
hsa_circRNA_100920	11.9955	8.66844	-3.23716	9.42933	7.03e-05
hsa_circRNA_404890	7.086	8.66752	1.47747	2.78459	4.44e-05
hsa_circRNA_103171	10.0805	8.66349	-1.47114	2.77241	0.000797366
hsa_circRNA_103579	10.1025	8.66306	-1.26502	2.40331	0.00104871
hsa_circRNA_405407	6.72321	8.66214	1.91739	3.77739	7.13e-06
hsa_circRNA_104518	10.9149	8.65993	-2.08917	4.25503	0.000210757
hsa_circRNA_086159	7.52164	8.65957	1.20949	2.31256	0.0345259
hsa_circRNA_104867	7.44117	8.65845	1.15434	2.22582	6.69e-05
hsa_circRNA_000890	7.19805	8.65756	1.42231	2.68013	4.5e-06
hsa_circRNA_008029	7.06584	8.65217	1.48651	2.80211	6.56e-05
hsa_circRNA_034805	7.63922	8.65137	1.05626	2.07954	0.00577328
hsa_circRNA_100508	6.86768	8.65117	1.69389	3.23527	7.23e-05
hsa_circRNA_100015	9.99912	8.64894	-1.20171	2.30013	0.00314636
hsa_circRNA_101832	7.53249	8.64859	1.01616	2.02253	0.000684204
hsa_circRNA_073270	7.24142	8.64308	1.37886	2.60063	0.000284689
hsa_circRNA_001506	7.54544	8.64185	1.09402	2.13468	0.000393723
hsa_circRNA_101615	7.03805	8.63584	1.54828	2.92469	6.98e-05
hsa_circRNA_002641	10.1569	8.62358	-1.55968	2.94789	0.00183208
hsa_circRNA_036188	7.25937	8.62348	1.42744	2.68969	0.00146969
hsa_circRNA_400200	7.06208	8.61268	1.52569	2.87925	3.46e-06
hsa_circRNA_406276	6.63382	8.61176	1.91717	3.7768	0.000129402
hsa_circRNA_104716	6.79628	8.61164	1.82583	3.54511	4.72e-07
hsa_circRNA_050374	7.27027	8.61063	1.30705	2.47436	2.05e-06
hsa_circRNA_045556	6.87173	8.60756	1.73678	3.3329	0.00160817
hsa_circRNA_100780	6.63233	8.60704	1.87365	3.66459	2.26e-07
hsa_circRNA_082319	6.61851	8.60111	1.79995	3.48207	7.6e-05
hsa_circRNA_103986	7.6145	8.59922	1.00982	2.01366	0.00179742
hsa_circRNA_011267	7.25128	8.59471	1.41757	2.67136	0.00761903
hsa_circRNA_043626	7.25916	8.59404	1.37694	2.59717	0.000394902
hsa_circRNA_101795	7.47456	8.57545	1.13195	2.19155	0.00166504
hsa_circRNA_103417	7.45182	8.57222	1.08001	2.11405	3.68e-06
hsa_circRNA_101846	7.01319	8.56833	1.47932	2.78817	8.32e-05
hsa_circRNA_092495	10.5452	8.56685	-1.828	3.55044	7.23e-05
hsa_circRNA_102829	11.5538	8.56533	-2.77607	6.84985	8.18e-05
hsa_circRNA_405965	7.03468	8.56212	1.3151	2.4882	0.00261998
hsa_circRNA_084051	7.16581	8.56093	1.36614	2.5778	0.000142838
hsa_circRNA_406075	7.15623	8.55936	1.29654	2.45639	0.0184126
hsa_circRNA_103595	7.24663	8.55706	1.2669	2.40644	3.11e-06
hsa_circRNA_001153	7.04088	8.54895	1.55739	2.94321	0.00208722
hsa_circRNA_079329	9.61715	8.54757	-1.02291	2.03201	0.000135399
hsa_circRNA_078728	6.93161	8.54695	1.59844	3.02815	1.02e-05
hsa_circRNA_100067	10.4271	8.54513	-1.81431	3.51692	0.000170876
hsa_circRNA_059085	10.4256	8.54457	-1.90697	3.7502	2.6e-05
hsa_circRNA_102850	7.10045	8.5444	1.33214	2.51775	4.4e-05
hsa_circRNA_049784	7.06041	8.54375	1.43671	2.70703	7.69e-06
hsa_circRNA_008554	7.32476	8.5412	1.20557	2.30629	0.000896608
hsa_circRNA_029500	6.62005	8.54007	1.85542	3.61857	0.000102742
hsa_circRNA_400092	6.94653	8.54003	1.60228	3.03623	4.65e-05
hsa_circRNA_404891	6.75096	8.53962	1.66763	3.17692	0.000324573
hsa_circRNA_104293	5.55189	8.53876	2.80066	6.96758	0.000903924
hsa_circRNA_102091	6.99826	8.53842	1.5748	2.97894	0.000260411
hsa_circRNA_058191	6.64059	8.53711	1.9284	3.80632	0.00276655
hsa_circRNA_061577	7.27554	8.53496	1.2343	2.35267	0.0133325
hsa_circRNA_102894	10.6296	8.53265	-1.95856	3.88673	5.2e-05
hsa_circRNA_104748	7.49301	8.5308	1.13577	2.19737	0.00196859
hsa_circRNA_102504	7.12111	8.53077	1.37773	2.59859	1.18e-05
hsa_circRNA_405758	9.73964	8.53041	-1.10316	2.14825	0.00463021
hsa_circRNA_402266	10.4244	8.52814	-1.88182	3.68541	2.44e-05
hsa_circRNA_102122	7.41395	8.52608	1.03229	2.04527	0.000809089
hsa_circRNA_001717	7.26082	8.52422	1.20872	2.31133	0.000142748
hsa_circRNA_103066	9.54108	8.52236	-1.0018	2.00249	0.0336559
hsa_circRNA_040650	6.88884	8.5204	1.58806	3.00645	1.41e-05
hsa_circRNA_008989	7.1431	8.51916	1.31895	2.49484	3.51e-05
hsa_circRNA_007444	11.7474	8.5189	-3.15954	8.93542	8e-06
hsa_circRNA_104361	10.0887	8.51843	-1.359	2.56508	0.00168832
hsa_circRNA_104736	7.20675	8.51751	1.30629	2.47305	2.75e-05
hsa_circRNA_102574	7.13126	8.51595	1.30741	2.47497	5.76e-05
hsa_circRNA_067161	6.97668	8.51585	1.5153	2.85858	2.19e-05
hsa_circRNA_081599	7.44542	8.51312	1.06923	2.09831	0.00269623
hsa_circRNA_102032	11.4492	8.51036	-2.84359	7.17806	2.71e-05
hsa_circRNA_400030	6.91001	8.51016	1.55893	2.94636	0.000244742
hsa_circRNA_404632	10.7285	8.50551	-2.0887	4.25364	6.81e-06
hsa_circRNA_008828	7.36372	8.50467	1.17529	2.25838	0.0282006
hsa_circRNA_101534	11.1905	8.50439	-2.56282	5.90863	0.000873922
hsa_circRNA_001382	6.74741	8.50301	1.70329	3.25643	2.45e-05
hsa_circRNA_007408	6.8007	8.49647	1.66327	3.16733	6.35e-06
hsa_circRNA_005804	11.3659	8.49341	-2.76106	6.77892	2.93e-06
hsa_circRNA_100570	9.636	8.49314	-1.05106	2.07205	0.00483569
hsa_circRNA_101164	7.16696	8.49265	1.23055	2.34656	0.000125483
hsa_circRNA_050263	6.99755	8.4904	1.4758	2.78138	0.000436103
hsa_circRNA_028319	7.27957	8.48668	1.1431	2.20856	0.000171873
hsa_circRNA_404705	6.82177	8.48582	1.62374	3.08173	3.75e-05
hsa_circRNA_050545	6.78535	8.48457	1.67301	3.18879	1.2e-05
hsa_circRNA_100051	7.00667	8.48431	1.4712	2.77253	0.000490304
hsa_circRNA_104810	12.051	8.48068	-3.43919	10.8468	1.61e-06
hsa_circRNA_401432	7.22577	8.47874	1.14416	2.21017	0.000445997
hsa_circRNA_015382	7.19819	8.47595	1.16388	2.24059	0.000220198
hsa_circRNA_004496	6.75745	8.47585	1.64741	3.1327	2.03e-05
hsa_circRNA_100562	10.2127	8.47104	-1.71129	3.27454	5.92e-05
hsa_circRNA_400463	7.02636	8.47069	1.3335	2.52013	0.000856781
hsa_circRNA_035855	6.7384	8.4666	1.74199	3.34496	1.11e-05
hsa_circRNA_400005	6.96673	8.46588	1.5214	2.87069	0.0178936
hsa_circRNA_100100	10.0499	8.46569	-1.39847	2.63622	0.000988797
hsa_circRNA_104315	11.3422	8.46393	-2.91104	7.52162	0.000218024
hsa_circRNA_001832	6.80153	8.46377	1.74139	3.34357	2.94e-05
hsa_circRNA_100919	11.7399	8.46374	-3.20092	9.19547	3.16e-05
hsa_circRNA_104900	6.72847	8.46253	1.70083	3.25088	7.49e-05
hsa_circRNA_062415	6.62156	8.46234	1.79941	3.48079	0.000145942
hsa_circRNA_008289	6.91839	8.46131	1.499	2.82646	0.00052425
hsa_circRNA_102400	6.99462	8.45838	1.45611	2.74368	0.000118218
hsa_circRNA_101245	11.8527	8.458	-3.2578	9.56525	2.55e-05
hsa_circRNA_100355	11.8001	8.45591	-3.18725	9.1087	0.00015423
hsa_circRNA_001214	10.3376	8.45511	-1.87986	3.6804	6.63e-05
hsa_circRNA_100910	11.3952	8.45036	-2.85663	7.2432	3.43e-05
hsa_circRNA_065215	6.99236	8.44501	1.45633	2.7441	4.58e-05
hsa_circRNA_103023	7.09147	8.44493	1.41174	2.66057	0.00592303
hsa_circRNA_406266	6.35597	8.44292	1.93788	3.83142	2.59e-05
hsa_circRNA_104624	10.9767	8.44162	-2.48671	5.605	4.2e-05
hsa_circRNA_092570	6.86415	8.44156	1.55143	2.93108	6.55e-05
hsa_circRNA_401586	7.06273	8.44003	1.29151	2.44785	1.11e-05
hsa_circRNA_100479	10.1308	8.43889	-1.58474	2.99954	0.000381191
hsa_circRNA_001465	6.83992	8.43849	1.54052	2.909	0.000106997
hsa_circRNA_072917	10.2504	8.43798	-1.62002	3.0738	0.000792752
hsa_circRNA_104391	6.95848	8.43721	1.40705	2.65195	0.000326686
hsa_circRNA_101711	10.2992	8.43658	-1.80571	3.49601	6.03e-06
hsa_circRNA_104833	6.97719	8.43536	1.41455	2.66576	0.00081379
hsa_circRNA_012173	7.16385	8.43307	1.20399	2.30376	0.0025475
hsa_circRNA_004993	6.86759	8.43051	1.57349	2.97623	2.24e-05
hsa_circRNA_000150	7.16091	8.42733	1.32676	2.5084	0.000686323
hsa_circRNA_402197	6.99938	8.42668	1.5692	2.96741	0.00215366
hsa_circRNA_008587	7.44762	8.42145	1.00868	2.01207	0.00391792
hsa_circRNA_103669	7.09064	8.42024	1.31299	2.48456	3.47e-06
hsa_circRNA_102533	7.38226	8.41982	1.02718	2.03804	0.00184905
hsa_circRNA_004364	7.17887	8.41879	1.29064	2.44636	0.000454657
hsa_circRNA_405072	6.79947	8.4146	1.56973	2.96849	6.41e-07
hsa_circRNA_103898	7.0656	8.41342	1.23778	2.35835	0.000122496
hsa_circRNA_104801	6.64004	8.41333	1.71163	3.27532	1.59e-05
hsa_circRNA_101437	7.1322	8.40933	1.26584	2.40466	0.000259026
hsa_circRNA_103287	7.14391	8.40482	1.29026	2.44572	0.00760581
hsa_circRNA_406380	6.4285	8.40425	1.89988	3.73181	0.000180634
hsa_circRNA_000300	6.64623	8.40395	1.7208	3.29619	1.7e-05
hsa_circRNA_103684	6.82989	8.40115	1.55156	2.93133	0.000604548
hsa_circRNA_104327	10.5704	8.3987	-2.22728	4.6825	7.59e-05
hsa_circRNA_104396	7.01779	8.3968	1.32377	2.5032	7.51e-05
hsa_circRNA_037076	6.644	8.39465	1.6139	3.06079	0.000495097
hsa_circRNA_020964	7.07127	8.39223	1.27596	2.4216	0.00496366
hsa_circRNA_101460	7.18346	8.38987	1.17473	2.25751	0.00362135
hsa_circRNA_104205	7.28357	8.3897	1.03028	2.04242	0.000447484
hsa_circRNA_102333	6.90808	8.38452	1.44985	2.7318	4.77e-05
hsa_circRNA_030953	9.81628	8.38156	-1.21182	2.3163	0.00158912
hsa_circRNA_037366	7.1656	8.3798	1.08353	2.11921	0.024273
hsa_circRNA_051401	6.91757	8.37885	1.46776	2.76592	0.000758356
hsa_circRNA_003575	10.207	8.37731	-1.73413	3.32679	0.000908566
hsa_circRNA_105037	7.23268	8.37631	1.13136	2.19065	6.69e-06
hsa_circRNA_020990	7.16277	8.37439	1.22629	2.33965	0.000198461
hsa_circRNA_054882	10.1364	8.37311	-1.67191	3.18636	0.000204612
hsa_circRNA_013959	6.71151	8.3731	1.56535	2.95949	1.35e-05
hsa_circRNA_101942	9.49399	8.37301	-1.08935	2.12778	0.0109975
hsa_circRNA_101714	10.2362	8.3699	-1.72725	3.31095	1.67e-05
hsa_circRNA_086412	6.96638	8.36851	1.40763	2.65301	0.000462426
hsa_circRNA_406505	6.80414	8.36685	1.47251	2.77505	0.000477198
hsa_circRNA_100881	7.06465	8.36591	1.25503	2.38673	0.000127122
hsa_circRNA_083957	12.114	8.3638	-3.60912	12.2026	8.36e-06
hsa_circRNA_104072	11.3449	8.36366	-2.7264	6.61804	0.000101093
hsa_circRNA_007101	6.98501	8.36142	1.22435	2.3365	0.000362544
hsa_circRNA_104699	11.5151	8.35867	-2.84976	7.2088	0.000120669
hsa_circRNA_104122	10.9	8.35758	-2.4323	5.39755	8.99e-05
hsa_circRNA_067406	6.98154	8.3548	1.40592	2.64987	0.000120216
hsa_circRNA_102052	10.9121	8.35201	-2.35104	5.10192	0.000175128
hsa_circRNA_403782	6.78805	8.35105	1.44867	2.72956	0.000212829
hsa_circRNA_401760	9.37791	8.34983	-1.10497	2.15094	0.0255323
hsa_circRNA_086475	6.90344	8.34708	1.47327	2.77651	0.000101079
hsa_circRNA_400947	6.98108	8.34396	1.32712	2.509	0.000100313
hsa_circRNA_001216	6.85476	8.33859	1.51043	2.84895	0.000303988
hsa_circRNA_407051	7.09666	8.33835	1.29452	2.45296	8.2e-05
hsa_circRNA_405283	6.24603	8.33763	1.99512	3.98648	1.2e-05
hsa_circRNA_018379	9.69847	8.3356	-1.35291	2.55427	0.0010092
hsa_circRNA_405561	7.28152	8.33535	1.09266	2.13266	0.000365556
hsa_circRNA_083026	6.61101	8.33498	1.55053	2.92924	0.00147992
hsa_circRNA_405709	7.26598	8.3345	1.08713	2.1245	0.00186462
hsa_circRNA_020960	7.17176	8.33448	1.14265	2.20786	0.0130481
hsa_circRNA_104233	10.6104	8.33398	-2.13568	4.39445	1.03e-05
hsa_circRNA_029937	12.0661	8.33341	-3.6648	12.6828	5.31e-06
hsa_circRNA_104336	9.56591	8.33089	-1.19813	2.29443	0.00125319
hsa_circRNA_006728	6.91048	8.33042	1.30538	2.47149	3.54e-05
hsa_circRNA_406419	7.17444	8.32607	1.20486	2.30515	0.00337123
hsa_circRNA_407098	7.01999	8.32148	1.30322	2.46779	1.4e-05
hsa_circRNA_101002	7.25658	8.32006	1.07298	2.10378	0.00164632
hsa_circRNA_049704	6.71143	8.31951	1.65602	3.15145	4.53e-05
hsa_circRNA_103781	6.55204	8.31843	1.69964	3.2482	1.67e-06
hsa_circRNA_075912	6.40692	8.31543	1.83241	3.5613	2.65e-05
hsa_circRNA_103764	9.96791	8.31231	-1.52197	2.87183	0.0053586
hsa_circRNA_404904	7.06006	8.31229	1.15764	2.23092	0.000515473
hsa_circRNA_405429	6.97635	8.31131	1.37055	2.58569	0.000662993
hsa_circRNA_103248	7.20458	8.31044	1.11338	2.16352	0.00253257
hsa_circRNA_015677	12.4582	8.30943	-4.12621	17.4628	3.98e-06
hsa_circRNA_103488	9.95676	8.30582	-1.62576	3.08606	6.37e-05
hsa_circRNA_086474	6.96977	8.30482	1.32104	2.49846	0.000892518
hsa_circRNA_001810	9.98526	8.29967	-1.56589	2.9606	0.000347255
hsa_circRNA_402000	7.26199	8.29824	1.0122	2.01698	0.000110185
hsa_circRNA_101863	7.21485	8.29799	1.11368	2.16398	0.00749873
hsa_circRNA_102673	10.0432	8.29701	-1.55083	2.92985	0.00487322
hsa_circRNA_100878	6.86406	8.29625	1.38335	2.60873	8.66e-06
hsa_circRNA_103490	9.7223	8.29543	-1.4157	2.66789	0.000507272
hsa_circRNA_103580	7.36739	8.2953	1.06694	2.09498	0.0454074
hsa_circRNA_042339	6.94014	8.29525	1.30136	2.46461	1.95e-05
hsa_circRNA_104166	6.85775	8.29499	1.35246	2.55347	1.09e-05
hsa_circRNA_101337	6.91246	8.28801	1.33867	2.52918	7.79e-06
hsa_circRNA_406926	10.4393	8.28761	-1.96336	3.8997	3.79e-05
hsa_circRNA_003779	6.61983	8.28748	1.66857	3.179	5.45e-05
hsa_circRNA_405196	6.66239	8.28583	1.63329	3.10219	8.08e-07
hsa_circRNA_406686	6.47977	8.28569	1.83769	3.57436	8.08e-06
hsa_circRNA_052535	6.74888	8.28401	1.64854	3.13516	0.00109203
hsa_circRNA_103124	10.1558	8.28232	-1.78456	3.44513	5.36e-05
hsa_circRNA_102433	10.6665	8.282	-2.19135	4.56734	4.84e-05
hsa_circRNA_103503	11.8195	8.28053	-3.41797	10.6884	8.9e-06
hsa_circRNA_104678	9.53859	8.27977	-1.3483	2.54612	0.00335886
hsa_circRNA_052372	6.67335	8.279	1.49257	2.8139	2.64e-05
hsa_circRNA_057028	9.31193	8.27696	-1.02382	2.03329	6.24e-05
hsa_circRNA_008264	6.9071	8.27236	1.28941	2.44429	4.64e-06
hsa_circRNA_403150	9.53477	8.27039	-1.13145	2.19079	0.0113016
hsa_circRNA_101903	9.84646	8.27009	-1.42668	2.68827	0.00159152
hsa_circRNA_100590	10.2307	8.26924	-1.83355	3.56414	0.00257441
hsa_circRNA_001225	6.7754	8.26406	1.26564	2.40434	0.0159082
hsa_circRNA_100172	6.96228	8.262	1.28839	2.44255	0.000106893
hsa_circRNA_029830	9.68733	8.25955	-1.42387	2.68304	0.00132969
hsa_circRNA_101336	6.78645	8.25867	1.32688	2.50859	2.12e-05
hsa_circRNA_007776	9.64145	8.25223	-1.40225	2.64314	0.000137947
hsa_circRNA_001593	6.76891	8.25213	1.48086	2.79115	2.27e-05
hsa_circRNA_100320	9.79413	8.24954	-1.48484	2.79887	0.000133296
hsa_circRNA_002268	6.82501	8.24948	1.44748	2.72731	0.00121
hsa_circRNA_104339	7.0843	8.24804	1.26853	2.40916	0.000611375
hsa_circRNA_062032	6.35351	8.24086	1.85544	3.61862	2.16e-05
hsa_circRNA_101981	11.3166	8.23986	-2.94802	7.7169	6.48e-05
hsa_circRNA_104034	10.2301	8.23956	-1.86175	3.63449	8.7e-05
hsa_circRNA_047467	6.3292	8.2386	1.84521	3.59306	6.37e-07
hsa_circRNA_002758	6.69198	8.23847	1.44726	2.7269	0.000145069
hsa_circRNA_101957	10.4127	8.23824	-2.01552	4.04327	0.00140742
hsa_circRNA_002529	6.81333	8.23778	1.39442	2.62882	0.000286321
hsa_circRNA_000858	6.13561	8.23679	1.963	3.89872	0.000421319
hsa_circRNA_100610	11.0727	8.23627	-2.71815	6.58027	5.28e-05
hsa_circRNA_092458	9.43575	8.23427	-1.16515	2.24257	0.00847695
hsa_circRNA_003237	6.45881	8.23303	1.63516	3.10621	0.0010393
hsa_circRNA_007008	6.61876	8.23259	1.53887	2.90566	0.000175536
hsa_circRNA_060176	6.86026	8.23238	1.32207	2.50025	1.73e-05
hsa_circRNA_011167	11.0129	8.23218	-2.7015	6.50476	0.000178711
hsa_circRNA_100754	6.71504	8.2314	1.43877	2.7109	2.11e-05
hsa_circRNA_011032	6.7803	8.22897	1.4442	2.72113	0.000183018
hsa_circRNA_006998	6.82863	8.22771	1.42191	2.67939	7.3e-06
hsa_circRNA_100197	7.09973	8.2245	1.14209	2.207	0.00157216
hsa_circRNA_406231	7.06427	8.22284	1.01038	2.01444	0.00288719
hsa_circRNA_101715	6.94506	8.22223	1.11793	2.17035	0.00771594
hsa_circRNA_022767	6.84869	8.2186	1.27401	2.41834	7.35e-05
hsa_circRNA_104591	10.9315	8.21584	-2.63923	6.23001	2.24e-05
hsa_circRNA_103344	11.5295	8.21531	-3.12177	8.70458	0.000124837
hsa_circRNA_022764	6.60016	8.20997	1.46768	2.76577	4.88e-05
hsa_circRNA_400014	6.58012	8.20951	1.49976	2.82796	6.62e-05
hsa_circRNA_103920	6.97023	8.2076	1.20751	2.30938	0.00120893
hsa_circRNA_101539	6.8403	8.20203	1.2388	2.36003	0.000323917
hsa_circRNA_104533	11.8733	8.1957	-3.62688	12.3538	0.000180602
hsa_circRNA_406254	6.53354	8.19272	1.52607	2.88	0.000848831
hsa_circRNA_103978	9.68472	8.19157	-1.43332	2.70067	0.000194457
hsa_circRNA_102893	10.6349	8.19149	-2.35359	5.11096	2.2e-06
hsa_circRNA_100209	6.9109	8.19081	1.25922	2.39367	6.74e-06
hsa_circRNA_100611	10.9131	8.18964	-2.67196	6.37295	1.5e-05
hsa_circRNA_101243	10.9664	8.18855	-2.67084	6.36801	2.86e-05
hsa_circRNA_077582	6.52474	8.18849	1.64083	3.11845	0.000340606
hsa_circRNA_007135	10.143	8.18754	-1.91531	3.77196	0.000347301
hsa_circRNA_404776	6.42647	8.1856	1.59297	3.0167	0.000446665
hsa_circRNA_101939	6.47865	8.18557	1.61534	3.06383	4.8e-05
hsa_circRNA_100829	10.1214	8.18459	-1.85902	3.62761	0.000204759
hsa_circRNA_045871	6.75254	8.18373	1.37782	2.59876	0.00430953
hsa_circRNA_104819	9.26605	8.17767	-1.09798	2.14055	0.000276187
hsa_circRNA_406730	6.57322	8.17635	1.54639	2.92086	0.000299351
hsa_circRNA_043781	7.02721	8.17622	1.11911	2.17213	0.00991195
hsa_circRNA_401126	6.97739	8.17112	1.10642	2.15311	0.0137814
hsa_circRNA_405786	6.37274	8.16971	1.71229	3.2768	1.88e-05
hsa_circRNA_103492	9.86672	8.16922	-1.6886	3.22344	0.000161051
hsa_circRNA_010206	7.08032	8.16501	1.01082	2.01506	3.61e-05
hsa_circRNA_403751	6.88702	8.16293	1.19446	2.2886	0.000330203
hsa_circRNA_406778	9.55336	8.15843	-1.25449	2.38582	0.00109217
hsa_circRNA_100379	7.14819	8.15346	1.04913	2.06928	0.0187469
hsa_circRNA_101870	9.98602	8.14789	-1.72134	3.29742	0.00074998
hsa_circRNA_102810	6.4335	8.14757	1.50716	2.8425	0.000436961
hsa_circRNA_407284	7.06634	8.1455	1.10212	2.1467	0.00271598
hsa_circRNA_405386	6.4965	8.14444	1.63655	3.10922	5.85e-05
hsa_circRNA_404961	6.71589	8.14367	1.34551	2.5412	0.00071674
hsa_circRNA_000352	6.51821	8.14101	1.55806	2.94457	3.54e-05
hsa_circRNA_001547	6.87559	8.13824	1.13566	2.1972	0.000613432
hsa_circRNA_104079	9.38698	8.13522	-1.0659	2.09348	0.00621314
hsa_circRNA_000250	6.80913	8.13511	1.20465	2.30481	0.00186277
hsa_circRNA_104809	10.6788	8.13361	-2.38983	5.24096	4.24e-05
hsa_circRNA_085018	6.72523	8.13151	1.40897	2.65547	0.000456446
hsa_circRNA_405589	7.06731	8.1265	1.06755	2.09588	0.00928671
hsa_circRNA_104338	6.38883	8.12636	1.6991	3.24697	5.66e-07
hsa_circRNA_100329	6.90168	8.12185	1.16825	2.24739	3.89e-05
hsa_circRNA_041586	6.32061	8.12112	1.68822	3.22258	0.00017518
hsa_circRNA_101344	11.2991	8.11643	-2.96193	7.79166	8.88e-05
hsa_circRNA_004528	6.30967	8.11388	1.74316	3.34768	4.53e-06
hsa_circRNA_004135	6.7254	8.11276	1.35107	2.55101	1.77e-05
hsa_circRNA_100327	6.42798	8.1119	1.68052	3.20544	2.49e-05
hsa_circRNA_405393	6.54538	8.11116	1.54386	2.91574	1.8e-05
hsa_circRNA_008981	9.94462	8.1107	-1.63089	3.09705	0.00244221
hsa_circRNA_104866	6.805	8.10919	1.2568	2.38966	0.000270332
hsa_circRNA_058883	6.74536	8.10646	1.36641	2.57827	0.0150141
hsa_circRNA_406455	6.6559	8.10484	1.31577	2.48936	6.06e-05
hsa_circRNA_103523	9.21518	8.10373	-1.06092	2.08625	0.000507576
hsa_circRNA_100848	6.77824	8.10095	1.27697	2.42329	0.00122028
hsa_circRNA_103089	6.81316	8.10024	1.19498	2.28942	0.00013115
hsa_circRNA_092540	6.73543	8.09832	1.32038	2.49731	3.6e-05
hsa_circRNA_001049	6.5625	8.08864	1.42422	2.6837	0.000275617
hsa_circRNA_000917	6.8403	8.08627	1.22092	2.33096	5e-06
hsa_circRNA_101568	10.5973	8.08517	-2.3557	5.11841	7.04e-05
hsa_circRNA_001714	6.94588	8.0834	1.01117	2.01555	0.000307711
hsa_circRNA_104320	9.44514	8.08013	-1.40402	2.64637	0.000527232
hsa_circRNA_100016	10.5484	8.07635	-2.24218	4.7311	0.000152726
hsa_circRNA_405962	7.05319	8.07605	1.03404	2.04775	0.000327308
hsa_circRNA_100770	6.782	8.0743	1.27967	2.42783	8.33e-05
hsa_circRNA_003813	6.57956	8.07409	1.28064	2.42947	0.00192071
hsa_circRNA_092573	11.0901	8.07056	-3.01148	8.06393	3.35e-06
hsa_circRNA_101078	6.24198	8.0704	1.7923	3.46368	0.000348786
hsa_circRNA_052154	6.50118	8.07038	1.5695	2.96803	0.0097494
hsa_circRNA_104830	6.98847	8.06892	1.12689	2.18388	0.0031443
hsa_circRNA_100080	11.2697	8.06669	-3.04419	8.24885	0.000182796
hsa_circRNA_104903	6.9253	8.06268	1.24917	2.37704	0.017065
hsa_circRNA_066331	6.78509	8.06145	1.28897	2.44353	0.000518134
hsa_circRNA_004912	11.0674	8.06052	-2.83488	7.13486	0.000478313
hsa_circRNA_103879	6.77431	8.05927	1.21863	2.32726	0.00801182
hsa_circRNA_100125	10.6377	8.05509	-2.50982	5.69547	0.000177491
hsa_circRNA_100024	6.48918	8.0535	1.5466	2.92129	1.06e-05
hsa_circRNA_007836	6.53877	8.05328	1.5497	2.92757	0.00976381
hsa_circRNA_100039	10.1209	8.05307	-2.04434	4.12484	0.000166732
hsa_circRNA_102826	10.7043	8.04389	-2.62158	6.15423	3.32e-06
hsa_circRNA_026523	6.64773	8.04074	1.38412	2.61013	0.000123033
hsa_circRNA_070948	6.49905	8.03672	1.46657	2.76364	8.46e-06
hsa_circRNA_102303	6.76742	8.03506	1.21035	2.31393	7.43e-05
hsa_circRNA_040831	6.9665	8.03483	1.03322	2.04659	0.00681652
hsa_circRNA_102742	9.82632	8.03179	-1.64363	3.12452	0.000430993
hsa_circRNA_400187	6.86255	8.03063	1.08595	2.12278	0.000128984
hsa_circRNA_100895	9.76321	8.02764	-1.70411	3.25829	0.000112183
hsa_circRNA_100887	6.34909	8.02533	1.65024	3.13885	8.25e-06
hsa_circRNA_404720	6.28289	8.02407	1.68678	3.21938	1.51e-05
hsa_circRNA_402917	6.85642	8.02244	1.17787	2.26243	0.000218719
hsa_circRNA_401849	10.137	8.01771	-2.14893	4.435	0.000336649
hsa_circRNA_007022	6.36772	8.01662	1.55316	2.93458	8.02e-06
hsa_circRNA_405841	6.64786	8.01617	1.34469	2.53976	3.64e-05
hsa_circRNA_101146	9.54453	8.01456	-1.49497	2.81859	0.0052648
hsa_circRNA_055943	10.0565	8.01056	-1.8366	3.57168	8.08e-05
hsa_circRNA_008397	10.1402	8.0066	-1.96173	3.89529	0.000897521
hsa_circRNA_102896	6.94915	8.00621	1.04741	2.06682	0.00239702
hsa_circRNA_060332	6.31884	8.0062	1.66978	3.18166	1.42e-05
hsa_circRNA_101928	6.86083	8.00538	1.06715	2.09529	6.07e-05
hsa_circRNA_020235	6.9876	8.00466	1.04221	2.05939	0.000559486
hsa_circRNA_075215	6.53515	8.00401	1.44092	2.71493	9.61e-07
hsa_circRNA_000536	6.59913	8.0023	1.43021	2.69487	0.000561598
hsa_circRNA_404588	6.71355	8.00193	1.2184	2.32688	6.5e-05
hsa_circRNA_101933	9.12509	7.9993	-1.11082	2.15968	0.000136136
hsa_circRNA_006173	6.51728	7.99562	1.36221	2.57078	0.00248424
hsa_circRNA_102545	6.29071	7.99393	1.62203	3.07809	2.76e-05
hsa_circRNA_100624	9.38322	7.99262	-1.38861	2.61826	0.00147381
hsa_circRNA_102056	6.60308	7.99244	1.29171	2.44819	0.00259321
hsa_circRNA_104536	6.92709	7.99236	1.08616	2.12309	2.86e-05
hsa_circRNA_402129	6.3537	7.99163	1.52909	2.88603	0.000143946
hsa_circRNA_083789	6.79579	7.99062	1.14898	2.21757	7.8e-05
hsa_circRNA_103636	11.2594	7.98903	-3.18123	9.07081	3.07e-06
hsa_circRNA_104266	6.42512	7.98792	1.54825	2.92462	0.00716778
hsa_circRNA_104415	6.66108	7.9873	1.35695	2.56144	6.7e-06
hsa_circRNA_100625	9.37289	7.98722	-1.49668	2.82192	0.00460543
hsa_circRNA_100937	6.54939	7.98708	1.47303	2.77605	3.22e-05
hsa_circRNA_005048	6.17511	7.98279	1.67476	3.19267	0.00250773
hsa_circRNA_000535	11.2771	7.98186	-3.09592	8.54997	1.88e-05
hsa_circRNA_103255	6.57269	7.98042	1.45691	2.7452	0.000146349
hsa_circRNA_400563	6.31473	7.97902	1.72463	3.30496	6.31e-06
hsa_circRNA_102975	6.85826	7.97367	1.14524	2.21183	2.33e-05
hsa_circRNA_102021	9.37441	7.97062	-1.38091	2.60433	7.85e-06
hsa_circRNA_090320	6.5935	7.96789	1.44587	2.72428	0.000122565
hsa_circRNA_404620	6.79762	7.9678	1.09197	2.13165	0.000168131
hsa_circRNA_057725	10.9614	7.96272	-2.84203	7.1703	7.24e-07
hsa_circRNA_103335	9.94692	7.96125	-1.87395	3.66535	6.41e-05
hsa_circRNA_400222	10.6916	7.96118	-2.55147	5.8623	4.28e-06
hsa_circRNA_000207	5.67324	7.9607	2.09403	4.26939	0.00058458
hsa_circRNA_044833	9.4524	7.95692	-1.3628	2.57184	5.17e-05
hsa_circRNA_007672	6.73445	7.95231	1.14399	2.20991	0.000323051
hsa_circRNA_405909	6.85347	7.94442	1.09023	2.12908	0.00142165
hsa_circRNA_400982	5.91331	7.94329	1.95672	3.88178	0.000173022
hsa_circRNA_061107	6.94276	7.94314	1.04967	2.07005	0.000270696
hsa_circRNA_101287	9.48472	7.94257	-1.52693	2.88172	0.0315956
hsa_circRNA_054220	6.43333	7.9405	1.53541	2.89871	0.00440224
hsa_circRNA_101314	9.89139	7.94007	-1.8972	3.7249	2.3e-05
hsa_circRNA_104859	9.68176	7.93852	-1.74545	3.353	0.000195532
hsa_circRNA_102872	5.96097	7.93639	1.90402	3.74255	7.99e-05
hsa_circRNA_101934	9.79154	7.93615	-1.71951	3.29325	1.12e-05
hsa_circRNA_104913	10.091	7.93585	-2.07021	4.19946	0.000342088
hsa_circRNA_001240	6.40667	7.93562	1.39746	2.63437	3.34e-05
hsa_circRNA_103182	6.58049	7.93359	1.22759	2.34175	8.39e-05
hsa_circRNA_405361	10.4577	7.93335	-2.37898	5.2017	0.00084886
hsa_circRNA_049537	6.57849	7.93208	1.38501	2.61173	0.00194701
hsa_circRNA_011205	6.71592	7.93108	1.20701	2.30858	1.43e-05
hsa_circRNA_000268	10.1028	7.93079	-2.16755	4.49259	1.46e-05
hsa_circRNA_404912	6.85425	7.9307	1.0387	2.05437	8.04e-05
hsa_circRNA_103758	11.1375	7.93062	-3.04735	8.26693	4.37e-05
hsa_circRNA_003251	9.86354	7.92884	-1.92501	3.79741	0.00645768
hsa_circRNA_001239	6.5485	7.92233	1.35745	2.56232	1.7e-05
hsa_circRNA_101584	6.64754	7.92117	1.25334	2.38392	0.0101617
hsa_circRNA_104805	10.7147	7.92069	-2.61739	6.13638	9.71e-05
hsa_circRNA_004262	6.50802	7.92022	1.33252	2.51841	0.00476558
hsa_circRNA_406934	6.79506	7.91131	1.0714	2.10148	0.000690687
hsa_circRNA_018818	6.71837	7.91063	1.14614	2.21321	5.11e-05
hsa_circRNA_103637	9.83753	7.91036	-1.71475	3.2824	0.00250286
hsa_circRNA_000487	6.49528	7.90917	1.53222	2.89231	0.00265374
hsa_circRNA_105052	6.95608	7.90913	1.01469	2.02047	0.0403665
hsa_circRNA_400063	6.31747	7.90744	1.48715	2.80334	1.17e-05
hsa_circRNA_065702	6.41228	7.90744	1.44801	2.72831	3.48e-06
hsa_circRNA_101251	6.80261	7.90354	1.17581	2.2592	0.00343401
hsa_circRNA_407239	6.30924	7.90351	1.42196	2.6795	0.00359823
hsa_circRNA_046598	6.75718	7.90262	1.16178	2.23733	0.00169548
hsa_circRNA_406677	6.48384	7.90095	1.37921	2.60125	1.16e-05
hsa_circRNA_003826	10.7156	7.90066	-2.75994	6.7737	1.49e-05
hsa_circRNA_102070	6.57714	7.89956	1.38056	2.60369	0.00915481
hsa_circRNA_100632	5.84615	7.89849	1.85041	3.60603	0.000645648
hsa_circRNA_407088	5.9681	7.8981	1.81583	3.52062	5.34e-05
hsa_circRNA_100742	9.72325	7.89598	-1.69198	3.23101	2.49e-06
hsa_circRNA_406628	6.4303	7.89593	1.41202	2.6611	4.81e-05
hsa_circRNA_104578	6.61247	7.89485	1.2526	2.38271	5.55e-06
hsa_circRNA_407285	6.35245	7.8948	1.3554	2.55867	0.00278632
hsa_circRNA_056734	6.5947	7.89141	1.31188	2.48265	2.27e-05
hsa_circRNA_079787	10.7268	7.88942	-2.83091	7.11525	1.79e-05
hsa_circRNA_102066	6.64322	7.88911	1.29391	2.45192	0.000252241
hsa_circRNA_100219	9.10262	7.88628	-1.22009	2.3296	0.0180734
hsa_circRNA_102357	9.13634	7.8836	-1.22795	2.34235	0.0115862
hsa_circRNA_102630	10.1313	7.88354	-2.06584	4.18678	0.000238141
hsa_circRNA_062556	6.7062	7.88065	1.25631	2.38884	0.013756
hsa_circRNA_104577	6.54554	7.87941	1.23515	2.35405	6.96e-05
hsa_circRNA_104462	9.14769	7.8791	-1.20564	2.30639	0.000586423
hsa_circRNA_026462	6.55079	7.87831	1.27275	2.41621	0.00190292
hsa_circRNA_103205	10.5072	7.87693	-2.57718	5.96772	3.1e-05
hsa_circRNA_100318	10.169	7.87582	-2.25027	4.75771	4.28e-05
hsa_circRNA_405520	6.74427	7.87541	1.07742	2.11026	0.00246051
hsa_circRNA_092498	11.2904	7.87263	-3.47785	11.1413	1.34e-05
hsa_circRNA_103740	11.557	7.86623	-3.57556	11.922	2.27e-06
hsa_circRNA_405448	6.53408	7.86555	1.30962	2.47877	9.9e-06
hsa_circRNA_005536	6.47454	7.86443	1.34939	2.54805	1.08e-05
hsa_circRNA_401580	6.6475	7.86402	1.1768	2.26075	4.46e-05
hsa_circRNA_103572	12.1631	7.86198	-4.08456	16.9659	2.85e-05
hsa_circRNA_100832	6.27848	7.85986	1.4382	2.70983	0.00241383
hsa_circRNA_040111	6.68449	7.8593	1.10959	2.15785	0.0195877
hsa_circRNA_402622	9.20855	7.85908	-1.33059	2.51505	4e-06
hsa_circRNA_001856	9.40894	7.85721	-1.49134	2.8115	7.22e-05
hsa_circRNA_000102	6.48986	7.8564	1.16376	2.2404	0.0122489
hsa_circRNA_104328	9.95385	7.85593	-2.16119	4.47283	0.000118604
hsa_circRNA_005887	9.63715	7.85583	-1.66112	3.16263	0.000231917
hsa_circRNA_100011	9.26048	7.85379	-1.291	2.44698	0.00219898
hsa_circRNA_100778	6.36245	7.85268	1.382	2.6063	6.02e-05
hsa_circRNA_404218	6.88768	7.85221	1.04141	2.05824	0.0157695
hsa_circRNA_104953	6.60401	7.85219	1.22068	2.33056	7.67e-05
hsa_circRNA_101004	6.16639	7.8521	1.63958	3.11576	0.0176916
hsa_circRNA_103641	9.79572	7.85142	-1.65687	3.15331	0.00164388
hsa_circRNA_104512	6.34907	7.84693	1.29288	2.45017	0.000351015
hsa_circRNA_405882	6.15154	7.84693	1.60311	3.03797	0.000417245
hsa_circRNA_104935	6.67202	7.84365	1.17488	2.25775	0.00483179
hsa_circRNA_062400	5.90188	7.84181	1.89309	3.71429	0.00470375
hsa_circRNA_401576	9.20122	7.84137	-1.14306	2.20849	0.000927363
hsa_circRNA_104069	9.14589	7.84118	-1.27987	2.42816	0.000106829
hsa_circRNA_102799	6.33824	7.83977	1.37197	2.58825	0.000196346
hsa_circRNA_102077	10.8261	7.83869	-2.86276	7.27406	3.08e-05
hsa_circRNA_404463	6.49001	7.83308	1.28606	2.4386	0.000323951
hsa_circRNA_000889	10.6048	7.83201	-2.63894	6.22874	6.03e-05
hsa_circRNA_056159	5.99348	7.83047	1.75501	3.37529	4.6e-06
hsa_circRNA_043637	6.40407	7.83043	1.36314	2.57245	0.0106922
hsa_circRNA_405143	6.71597	7.83001	1.04604	2.06485	0.00105898
hsa_circRNA_013729	10.5331	7.82886	-2.68406	6.42663	6.58e-05
hsa_circRNA_102736	10.9093	7.82738	-2.93819	7.66451	1.95e-05
hsa_circRNA_008817	10.6099	7.82735	-2.69456	6.47357	1.33e-05
hsa_circRNA_007738	6.27483	7.82682	1.31527	2.48849	0.021708
hsa_circRNA_001357	6.68976	7.82257	1.07397	2.10521	0.00119156
hsa_circRNA_044370	6.3904	7.82187	1.31396	2.48623	0.00174914
hsa_circRNA_102133	9.50036	7.82052	-1.61479	3.06267	2.77e-05
hsa_circRNA_091000	6.47012	7.81462	1.37809	2.59925	0.0146974
hsa_circRNA_100626	8.96475	7.81452	-1.22689	2.34061	0.00732633
hsa_circRNA_100183	6.3628	7.81429	1.39731	2.6341	0.00041367
hsa_circRNA_100950	9.21172	7.8128	-1.26716	2.40687	0.00690499
hsa_circRNA_002111	10.4237	7.8125	-2.46962	5.53899	0.000197681
hsa_circRNA_035301	6.68942	7.81065	1.22639	2.3398	0.0289396
hsa_circRNA_406502	10.1129	7.81043	-2.092	4.2634	0.00307122
hsa_circRNA_403634	6.68922	7.8089	1.11062	2.15938	0.000191531
hsa_circRNA_103046	9.44884	7.80755	-1.63899	3.11449	0.000735539
hsa_circRNA_000966	6.42001	7.80721	1.20922	2.31213	0.000567063
hsa_circRNA_000792	6.49865	7.80664	1.18692	2.27666	7.41e-06
hsa_circRNA_101579	6.68853	7.80567	1.13681	2.19894	0.00271804
hsa_circRNA_406347	5.81387	7.80517	1.96014	3.891	6.61e-05
hsa_circRNA_101718	6.6568	7.80405	1.10459	2.15037	4.25e-05
hsa_circRNA_101351	9.73679	7.80374	-1.83941	3.57864	0.000682086
hsa_circRNA_039172	6.43148	7.80338	1.29182	2.44836	0.0133724
hsa_circRNA_401357	6.47167	7.80252	1.25688	2.38978	0.000744629
hsa_circRNA_104485	9.99121	7.79901	-2.06491	4.18409	1.12e-05
hsa_circRNA_100447	6.31391	7.7966	1.45193	2.73574	0.000214663
hsa_circRNA_401840	9.24963	7.79437	-1.33287	2.51903	6.07e-05
hsa_circRNA_101296	6.48821	7.7937	1.31925	2.49536	2.84e-05
hsa_circRNA_403876	9.99682	7.79307	-2.03889	4.10928	0.000703342
hsa_circRNA_004145	10.004	7.79273	-2.15405	4.45075	2.16e-05
hsa_circRNA_001991	6.27612	7.79254	1.39245	2.62524	0.000237321
hsa_circRNA_092432	6.57202	7.78804	1.20187	2.30038	2.16e-05
hsa_circRNA_082865	6.41338	7.7871	1.29371	2.45157	0.000309377
hsa_circRNA_101360	10.6894	7.78654	-2.79554	6.94289	1.07e-05
hsa_circRNA_007051	5.85228	7.78637	1.6935	3.23441	0.00308187
hsa_circRNA_402510	9.16897	7.78605	-1.21438	2.32041	0.00488895
hsa_circRNA_003454	6.64181	7.78203	1.114	2.16445	0.00077879
hsa_circRNA_101140	6.72566	7.77919	1.10139	2.14561	0.00242627
hsa_circRNA_101463	9.8294	7.77908	-1.96824	3.9129	4.86e-05
hsa_circRNA_403818	6.59226	7.77768	1.13165	2.19109	0.00026634
hsa_circRNA_103639	9.73949	7.77629	-1.69427	3.23613	0.00655065
hsa_circRNA_104074	10.3882	7.77622	-2.49049	5.6197	3.46e-06
hsa_circRNA_008620	11.3321	7.77405	-3.4834	11.1843	3.82e-06
hsa_circRNA_101096	9.51376	7.77037	-1.64536	3.12826	0.000245089
hsa_circRNA_000770	10.0872	7.7699	-2.24008	4.72424	7.03e-05
hsa_circRNA_005381	9.73009	7.76892	-1.80597	3.49663	0.000122617
hsa_circRNA_406408	6.48281	7.76881	1.31388	2.48608	0.0020854
hsa_circRNA_104635	6.52687	7.76806	1.22771	2.34196	0.000760376
hsa_circRNA_101062	6.41132	7.76784	1.32428	2.50409	1.55e-05
hsa_circRNA_102154	8.99954	7.76703	-1.10668	2.1535	0.00101722
hsa_circRNA_401782	8.8563	7.76577	-1.0266	2.03721	0.017208
hsa_circRNA_101789	5.91392	7.76518	1.74875	3.36066	6.35e-05
hsa_circRNA_104890	6.16703	7.76477	1.58033	2.99037	0.000135157
hsa_circRNA_405635	6.42405	7.76358	1.33917	2.53006	1.41e-05
hsa_circRNA_406073	6.62937	7.7614	1.10513	2.15118	0.00270735
hsa_circRNA_001737	6.44504	7.75986	1.23662	2.35646	5.71e-06
hsa_circRNA_104912	9.89574	7.7592	-2.02203	4.06155	0.000229322
hsa_circRNA_103275	9.19313	7.75848	-1.25103	2.38011	0.00281119
hsa_circRNA_103993	10.4858	7.75462	-2.6974	6.48631	8.51e-05
hsa_circRNA_101072	6.2749	7.75254	1.36092	2.56849	3.09e-06
hsa_circRNA_104597	9.17507	7.74959	-1.25503	2.38673	0.0283076
hsa_circRNA_036506	10.6584	7.74954	-2.8938	7.43226	0.000110636
hsa_circRNA_104856	9.10083	7.74754	-1.35788	2.56308	0.00109479
hsa_circRNA_001062	9.49931	7.74415	-1.61927	3.07219	0.0111288
hsa_circRNA_000174	6.28203	7.74385	1.46974	2.76972	7.59e-07
hsa_circRNA_101618	10.7957	7.74082	-3.00142	8.00789	3.97e-05
hsa_circRNA_102291	6.37963	7.73591	1.25836	2.39224	0.000458725
hsa_circRNA_017521	9.03711	7.73198	-1.34187	2.53479	0.00114504
hsa_circRNA_104475	6.31264	7.72904	1.39153	2.62358	1.4e-05
hsa_circRNA_087962	6.56151	7.72762	1.1339	2.19452	0.000120749
hsa_circRNA_025114	6.44873	7.7276	1.20747	2.30933	0.000114089
hsa_circRNA_102521	9.27917	7.7267	-1.40487	2.64795	0.00012458
hsa_circRNA_103403	5.97014	7.72625	1.71058	3.27291	1.96e-06
hsa_circRNA_100168	6.36344	7.72001	1.31464	2.4874	1.74e-05
hsa_circRNA_406270	6.36641	7.71775	1.40123	2.64127	0.000293163
hsa_circRNA_100443	9.99265	7.71659	-2.24782	4.74966	1.64e-06
hsa_circRNA_100065	9.53615	7.7124	-1.84754	3.59885	4.26e-05
hsa_circRNA_405542	6.58085	7.71176	1.04665	2.06573	0.000168245
hsa_circRNA_100009	6.64761	7.71111	1.04233	2.05955	0.000250565
hsa_circRNA_101512	8.70885	7.70918	-1.0339	2.04755	0.00099639
hsa_circRNA_104474	8.99375	7.70761	-1.30998	2.47939	3.22e-05
hsa_circRNA_069718	9.66609	7.70646	-1.71825	3.29038	0.000512088
hsa_circRNA_103330	6.64923	7.70643	1.04925	2.06945	0.0181443
hsa_circRNA_031449	6.48225	7.70581	1.15565	2.22785	0.000894424
hsa_circRNA_022306	6.58411	7.7057	1.16029	2.23503	2.48e-05
hsa_circRNA_402819	6.49866	7.70538	1.37515	2.59395	0.0318639
hsa_circRNA_100027	6.10815	7.70467	1.53374	2.89536	6.73e-06
hsa_circRNA_101865	10.3997	7.70197	-2.64194	6.24169	5.23e-05
hsa_circRNA_000466	6.06054	7.69909	1.61148	3.05564	0.000789251
hsa_circRNA_000459	6.27824	7.69435	1.37996	2.60262	3.57e-07
hsa_circRNA_016598	6.14898	7.6933	1.41405	2.66485	2.03e-05
hsa_circRNA_039219	6.43515	7.69181	1.1954	2.29009	6.06e-06
hsa_circRNA_011883	5.91936	7.69114	1.583	2.99593	1.37e-05
hsa_circRNA_104752	6.61636	7.69113	1.07764	2.11058	0.000294945
hsa_circRNA_406989	6.48861	7.68739	1.11	2.15845	5.73e-05
hsa_circRNA_101323	6.29921	7.68615	1.32805	2.51064	4.41e-05
hsa_circRNA_102820	9.47702	7.68606	-1.64157	3.12005	0.000419988
hsa_circRNA_403515	6.31086	7.68495	1.35975	2.5664	2.45e-06
hsa_circRNA_038516	5.91765	7.68447	1.68364	3.21238	0.000507212
hsa_circRNA_009181	8.77224	7.68387	-1.13657	2.19858	0.000113931
hsa_circRNA_103975	6.26417	7.68231	1.25849	2.39244	0.0142421
hsa_circRNA_056037	6.13098	7.6813	1.46473	2.76011	0.00019005
hsa_circRNA_008835	6.43666	7.6784	1.22754	2.34168	3.8e-05
hsa_circRNA_102039	9.09113	7.67838	-1.34666	2.54323	0.00326775
hsa_circRNA_000120	10.5522	7.67743	-2.78867	6.90993	0.00023566
hsa_circRNA_050055	6.27162	7.67694	1.4424	2.71773	1.14e-05
hsa_circRNA_000619	6.11311	7.67616	1.48773	2.80446	2.04e-05
hsa_circRNA_007623	6.32644	7.67259	1.20654	2.30784	0.0015482
hsa_circRNA_406007	6.44891	7.67029	1.18414	2.27228	0.00201292
hsa_circRNA_100823	6.11994	7.66924	1.65432	3.14775	0.000442054
hsa_circRNA_102416	6.52146	7.66724	1.09376	2.13429	9.54e-06
hsa_circRNA_102960	9.66739	7.66644	-1.91474	3.77045	0.000111599
hsa_circRNA_101904	8.90633	7.66581	-1.14108	2.20547	0.00100177
hsa_circRNA_103329	6.09735	7.66232	1.58176	2.99335	0.00577177
hsa_circRNA_007315	6.38002	7.66148	1.26652	2.40581	0.0026103
hsa_circRNA_100974	10.0341	7.66047	-2.34492	5.08033	0.00213421
hsa_circRNA_065532	6.48161	7.65964	1.13105	2.19017	0.000100129
hsa_circRNA_100253	6.49698	7.65785	1.19367	2.28734	9.33e-05
hsa_circRNA_102741	6.37512	7.65677	1.20137	2.29957	2.02e-06
hsa_circRNA_041939	6.53681	7.65336	1.13966	2.20329	0.000309689
hsa_circRNA_001680	6.54887	7.65287	1.08349	2.11916	0.00399947
hsa_circRNA_400428	8.79151	7.64722	-1.18335	2.27103	0.00433648
hsa_circRNA_078715	5.91317	7.64229	1.64983	3.13796	9.01e-06
hsa_circRNA_405080	6.1233	7.64201	1.48419	2.7976	7.47e-05
hsa_circRNA_018224	8.86009	7.6409	-1.25136	2.38065	3.06e-05
hsa_circRNA_406839	6.5005	7.64067	1.13192	2.1915	7.95e-05
hsa_circRNA_400073	6.39067	7.64011	1.25608	2.38846	0.000184163
hsa_circRNA_103437	10.1886	7.63956	-2.43596	5.41125	3.6e-06
hsa_circRNA_100492	6.58763	7.63927	1.01465	2.02041	0.00111723
hsa_circRNA_000412	10.0995	7.63915	-2.3362	5.04972	0.000150584
hsa_circRNA_400010	6.10063	7.63841	1.48521	2.79957	4.42e-06
hsa_circRNA_026232	10.4411	7.63832	-2.76353	6.79056	2.99e-07
hsa_circRNA_101462	9.84665	7.63752	-2.01385	4.03859	0.000116636
hsa_circRNA_101433	6.47952	7.63715	1.08552	2.12215	0.00406648
hsa_circRNA_405861	6.341	7.63423	1.25149	2.38088	0.000461935
hsa_circRNA_006526	9.56317	7.63369	-1.86086	3.63225	0.000120647
hsa_circRNA_000458	10.8253	7.62943	-3.14781	8.8631	1.3e-05
hsa_circRNA_026074	6.02201	7.62834	1.64537	3.12829	0.0361341
hsa_circRNA_102763	6.52818	7.62756	1.02602	2.03639	0.000114909
hsa_circRNA_102524	9.14672	7.62658	-1.38496	2.61165	1.44e-05
hsa_circRNA_000644	6.42771	7.62566	1.06288	2.0891	0.000119682
hsa_circRNA_103111	9.65174	7.62424	-1.916	3.77375	0.00112881
hsa_circRNA_406409	6.36615	7.62414	1.23064	2.34671	2.41e-05
hsa_circRNA_024081	6.31214	7.62398	1.31754	2.49241	0.000186994
hsa_circRNA_104282	6.23104	7.62326	1.28594	2.43841	0.00191514
hsa_circRNA_090311	6.15867	7.61934	1.56144	2.95148	8.57e-05
hsa_circRNA_055426	6.52677	7.61855	1.0393	2.05523	0.000121929
hsa_circRNA_407199	6.15214	7.61829	1.46509	2.76081	0.000176225
hsa_circRNA_406913	6.43539	7.61239	1.09261	2.13259	0.000396334
hsa_circRNA_103204	9.73263	7.61209	-2.02774	4.07766	0.000123662
hsa_circRNA_021827	8.62066	7.61159	-1.02284	2.03192	0.00134028
hsa_circRNA_005836	8.843	7.61066	-1.13785	2.20053	0.000142617
hsa_circRNA_074535	6.11096	7.61013	1.41562	2.66774	0.0114368
hsa_circRNA_100894	9.44862	7.60964	-1.7219	3.2987	1.2e-05
hsa_circRNA_103126	6.24161	7.60922	1.30074	2.46356	3.85e-06
hsa_circRNA_002011	10.6578	7.60909	-2.88696	7.39708	1.4e-05
hsa_circRNA_043598	6.05662	7.60825	1.49253	2.81381	0.00101611
hsa_circRNA_406246	5.56437	7.60759	1.84556	3.59393	0.00472109
hsa_circRNA_100922	11.2476	7.60739	-3.55677	11.7677	2.61e-05
hsa_circRNA_091537	6.24486	7.60738	1.279	2.4267	2.18e-06
hsa_circRNA_009548	9.41837	7.60367	-1.81958	3.52979	0.00163765
hsa_circRNA_405032	6.4619	7.60222	1.05945	2.08413	6.43e-06
hsa_circRNA_100012	9.9502	7.60075	-2.08811	4.25192	0.000525303
hsa_circRNA_401303	6.43755	7.59839	1.12414	2.17972	0.000904701
hsa_circRNA_403982	6.19061	7.59561	1.27417	2.41859	0.00504897
hsa_circRNA_104677	9.95875	7.5938	-2.25348	4.76832	9.78e-05
hsa_circRNA_082335	5.90073	7.59374	1.55582	2.94001	1.18e-05
hsa_circRNA_101161	6.41822	7.5927	1.11682	2.16869	0.000171416
hsa_circRNA_401697	10.1212	7.59248	-2.33132	5.03264	1.88e-05
hsa_circRNA_104852	10.3675	7.59208	-2.74417	6.70006	2.38e-07
hsa_circRNA_004885	6.43512	7.59081	1.09834	2.14109	0.000146081
hsa_circRNA_008685	6.60376	7.58982	1.04717	2.06648	0.026011
hsa_circRNA_100616	6.21987	7.58967	1.45567	2.74284	0.000191702
hsa_circRNA_404593	6.16339	7.58882	1.3215	2.49925	0.000365169
hsa_circRNA_101214	6.12871	7.58838	1.44841	2.72907	6.53e-08
hsa_circRNA_105001	6.36244	7.58376	1.2043	2.30425	0.000110751
hsa_circRNA_100726	5.91207	7.58346	1.57439	2.97811	4.93e-06
hsa_circRNA_100046	8.88647	7.5816	-1.14741	2.21515	0.000799243
hsa_circRNA_104821	10.0177	7.58024	-2.42987	5.38845	5.35e-06
hsa_circRNA_020050	6.42486	7.5799	1.02814	2.03939	0.000528182
hsa_circRNA_101985	9.89463	7.57753	-2.15185	4.44396	0.0035361
hsa_circRNA_001877	6.25814	7.57659	1.27099	2.41327	0.00111793
hsa_circRNA_102563	6.21476	7.57587	1.32689	2.50861	1.09e-05
hsa_circRNA_043821	5.58952	7.57271	1.84163	3.58414	0.000182642
hsa_circRNA_000581	10.277	7.56698	-2.60239	6.07292	8.07e-06
hsa_circRNA_101779	6.02367	7.56542	1.5381	2.90413	8.48e-06
hsa_circRNA_103939	6.16243	7.56462	1.35265	2.5538	0.001637
hsa_circRNA_405432	5.96374	7.56247	1.49078	2.81041	0.00631029
hsa_circRNA_008304	10.3585	7.56241	-2.62458	6.16704	0.000108235
hsa_circRNA_403015	5.9105	7.56225	1.59541	3.02181	0.000296644
hsa_circRNA_023908	10.5815	7.55611	-2.88745	7.39964	4.01e-06
hsa_circRNA_100498	5.98011	7.55594	1.60006	3.03155	0.000101234
hsa_circRNA_102010	8.64684	7.55592	-1.16749	2.2462	0.00710156
hsa_circRNA_101550	11.1781	7.55536	-3.46103	11.0122	0.000173597
hsa_circRNA_102213	6.09484	7.55465	1.29533	2.45432	0.00337049
hsa_circRNA_005921	8.76315	7.55315	-1.28907	2.4437	9.7e-05
hsa_circRNA_006187	6.33923	7.5527	1.24935	2.37735	0.00474761
hsa_circRNA_079387	6.20661	7.55113	1.25971	2.39448	2.64e-05
hsa_circRNA_104768	9.54387	7.55039	-1.90951	3.75683	3e-08
hsa_circRNA_076336	6.31165	7.54847	1.15752	2.23074	0.00010007
hsa_circRNA_011222	6.05885	7.54813	1.33276	2.51885	0.000621492
hsa_circRNA_102616	6.20291	7.54805	1.28068	2.42954	0.00398017
hsa_circRNA_402125	6.40196	7.5449	1.11969	2.17301	0.0024761
hsa_circRNA_103402	6.08754	7.54235	1.44645	2.72536	5.99e-05
hsa_circRNA_102492	5.85411	7.54229	1.50222	2.83278	0.00025706
hsa_circRNA_103179	6.306	7.54178	1.09622	2.13794	0.00257748
hsa_circRNA_103987	6.18017	7.54101	1.42245	2.68041	7.35e-05
hsa_circRNA_101332	6.33792	7.53908	1.14791	2.21593	0.000103572
hsa_circRNA_103730	6.00948	7.53774	1.53401	2.89589	0.00375814
hsa_circRNA_006522	6.39431	7.53769	1.05964	2.08441	0.00218344
hsa_circRNA_103413	6.40291	7.53619	1.19147	2.28385	0.000543269
hsa_circRNA_406165	6.39535	7.53613	1.12164	2.17594	0.021379
hsa_circRNA_103574	11.6327	7.53603	-3.9147	15.0814	8.39e-06
hsa_circRNA_024371	6.0268	7.53438	1.41183	2.66074	0.000332889
hsa_circRNA_082178	8.68269	7.53409	-1.18049	2.26653	0.000104835
hsa_circRNA_103556	9.28736	7.53409	-1.59355	3.01792	0.00140364
hsa_circRNA_011474	6.09755	7.53408	1.38901	2.619	0.00296017
hsa_circRNA_406416	5.92962	7.53403	1.60657	3.04526	2.67e-07
hsa_circRNA_017215	8.84814	7.53366	-1.35534	2.55857	0.00621733
hsa_circRNA_406717	6.19637	7.53193	1.26724	2.40701	0.00087478
hsa_circRNA_000874	6.48879	7.53102	1.05539	2.07827	0.00246024
hsa_circRNA_002953	6.09998	7.53039	1.41069	2.65865	0.000849442
hsa_circRNA_026468	5.90547	7.52716	1.47273	2.77546	0.0021486
hsa_circRNA_100151	8.60392	7.52701	-1.11126	2.16035	0.00740216
hsa_circRNA_001915	6.31906	7.5264	1.09038	2.1293	0.00571452
hsa_circRNA_036315	6.21445	7.52453	1.2375	2.3579	1.3e-05
hsa_circRNA_079926	8.51629	7.52413	-1.04275	2.06015	0.000690709
hsa_circRNA_103645	10.1805	7.51988	-2.52622	5.76059	4.63e-05
hsa_circRNA_100976	10.5658	7.51769	-2.99435	7.96875	3.05e-05
hsa_circRNA_001440	10.5904	7.51755	-3.02007	8.11207	6.65e-07
hsa_circRNA_059407	8.79387	7.51704	-1.2846	2.43614	0.000682007
hsa_circRNA_100357	10.2069	7.51458	-2.52361	5.75019	0.000119486
hsa_circRNA_005128	6.37521	7.51328	1.10832	2.15594	0.00301095
hsa_circRNA_004215	8.7657	7.5132	-1.29282	2.45007	5.77e-05
hsa_circRNA_104037	10.3216	7.51205	-2.64784	6.26729	1.56e-05
hsa_circRNA_100138	8.88494	7.51067	-1.19182	2.28441	0.00126535
hsa_circRNA_401299	8.83134	7.51063	-1.19228	2.28513	0.000266854
hsa_circRNA_003264	9.63837	7.51042	-2.00793	4.02206	0.000160042
hsa_circRNA_405121	9.70778	7.50977	-2.09827	4.28195	1.77e-05
hsa_circRNA_104692	10.7794	7.50909	-3.16488	8.9686	0.000140155
hsa_circRNA_103557	10.2795	7.50754	-2.74546	6.70603	1.12e-05
hsa_circRNA_102195	6.28764	7.50597	1.15884	2.23278	1.46e-06
hsa_circRNA_404723	6.24198	7.50482	1.25649	2.38914	1.11e-06
hsa_circRNA_404909	9.51472	7.50466	-1.59929	3.02993	0.0429271
hsa_circRNA_000950	6.29916	7.50437	1.13369	2.19419	0.0184629
hsa_circRNA_101636	6.19696	7.50166	1.22843	2.34311	1.27e-05
hsa_circRNA_406768	5.61495	7.49961	1.70906	3.26947	8.25e-05
hsa_circRNA_102581	6.35604	7.49782	1.09717	2.13935	1.51e-06
hsa_circRNA_102525	8.89356	7.49673	-1.2851	2.43699	0.000373507
hsa_circRNA_008592	8.57291	7.49431	-1.11484	2.16571	0.00890222
hsa_circRNA_103544	6.45219	7.49402	1.06525	2.09253	0.00242943
hsa_circRNA_103594	6.07395	7.49368	1.40348	2.64539	1.17e-05
hsa_circRNA_400093	6.14194	7.49227	1.34799	2.54558	0.000819536
hsa_circRNA_104300	9.1607	7.49186	-1.61679	3.06692	6.31e-06
hsa_circRNA_405652	6.43499	7.48975	1.01475	2.02055	0.000736097
hsa_circRNA_024596	6.11888	7.48857	1.28965	2.44469	3.69e-05
hsa_circRNA_104483	9.28534	7.48689	-1.68449	3.21426	1.1e-06
hsa_circRNA_037809	8.59956	7.48526	-1.07487	2.10653	0.00701384
hsa_circRNA_103384	6.23525	7.48492	1.23055	2.34657	0.00207896
hsa_circRNA_406676	6.09433	7.48399	1.43699	2.70755	0.000277837
hsa_circRNA_004884	6.14466	7.48232	1.43512	2.70404	0.00205212
hsa_circRNA_101553	9.75158	7.48024	-2.21642	4.6474	9.4e-05
hsa_circRNA_403604	6.23375	7.4777	1.18976	2.28115	0.000632961
hsa_circRNA_104500	5.98312	7.47767	1.45725	2.74584	0.000156831
hsa_circRNA_103240	6.41336	7.47724	1.06013	2.08512	0.00535214
hsa_circRNA_081379	9.46251	7.47108	-1.96661	3.90847	0.000920599
hsa_circRNA_051427	6.05796	7.46771	1.41133	2.65983	9.19e-05
hsa_circRNA_102725	10.1739	7.46619	-2.5225	5.74579	6.03e-06
hsa_circRNA_102951	6.30807	7.46535	1.09104	2.13027	0.000841236
hsa_circRNA_407222	6.27342	7.46152	1.10362	2.14893	0.00305702
hsa_circRNA_103566	9.56164	7.4606	-1.79005	3.45827	0.00120383
hsa_circRNA_001128	6.11943	7.45823	1.29419	2.45239	5.12e-06
hsa_circRNA_020094	6.19219	7.45694	1.20474	2.30495	3.93e-06
hsa_circRNA_103963	9.53081	7.45549	-1.95267	3.8709	0.00017358
hsa_circRNA_102764	6.35519	7.45483	1.00648	2.009	0.000408608
hsa_circRNA_070294	6.23319	7.45276	1.27242	2.41567	0.000268877
hsa_circRNA_104645	10.8017	7.45247	-3.12706	8.73653	3.12e-05
hsa_circRNA_019608	9.22941	7.45141	-1.68334	3.2117	0.000900018
hsa_circRNA_100385	6.32446	7.44926	1.04984	2.0703	0.000575619
hsa_circRNA_006465	9.95839	7.4488	-2.31016	4.95939	0.000224912
hsa_circRNA_074834	6.14413	7.44772	1.29044	2.44602	2.96e-06
hsa_circRNA_005496	8.99637	7.44719	-1.44429	2.72128	0.00297892
hsa_circRNA_101541	6.34305	7.44707	1.06964	2.09891	0.000590987
hsa_circRNA_000903	5.72391	7.44615	1.66459	3.17023	0.00159334
hsa_circRNA_404941	9.92895	7.44511	-2.38117	5.2096	5e-06
hsa_circRNA_100111	6.34314	7.44344	1.00424	2.00589	0.000183074
hsa_circRNA_103599	9.73777	7.44291	-2.15263	4.44638	0.000525886
hsa_circRNA_008260	8.92988	7.44008	-1.40387	2.64611	0.000105372
hsa_circRNA_071981	6.14085	7.43939	1.25568	2.38779	4.01e-06
hsa_circRNA_046689	5.92211	7.43939	1.45628	2.74399	0.000523449
hsa_circRNA_102657	9.14566	7.43915	-1.64442	3.12623	9.14e-06
hsa_circRNA_003148	10.0651	7.43737	-2.57386	5.954	2.23e-07
hsa_circRNA_102658	9.85861	7.43674	-2.3245	5.00893	9.21e-07
hsa_circRNA_407339	6.21231	7.43606	1.24277	2.36653	0.00012641
hsa_circRNA_101672	5.83965	7.43425	1.59983	3.03107	1.5e-05
hsa_circRNA_037936	6.17404	7.43377	1.21016	2.31363	8.42e-06
hsa_circRNA_000938	5.5171	7.4332	1.7804	3.43521	5.38e-05
hsa_circRNA_103322	9.40554	7.43111	-1.87806	3.6758	2.35e-05
hsa_circRNA_031147	8.88283	7.43083	-1.348	2.5456	0.000137654
hsa_circRNA_001359	6.0643	7.43036	1.25121	2.38041	0.00352748
hsa_circRNA_001046	6.12269	7.43029	1.23762	2.35809	1.2e-05
hsa_circRNA_402102	6.42585	7.43003	1.08198	2.11695	0.00241846
hsa_circRNA_010932	10.0199	7.42895	-2.37438	5.18513	0.000183916
hsa_circRNA_002458	10.0274	7.42857	-2.58978	6.02009	1.8e-07
hsa_circRNA_072251	5.99367	7.4275	1.43559	2.70493	5.8e-07
hsa_circRNA_000242	6.19142	7.4273	1.04913	2.06929	0.0197349
hsa_circRNA_405798	6.23762	7.42651	1.06816	2.09675	0.00473266
hsa_circRNA_102273	6.15264	7.42632	1.19551	2.29026	0.00312116
hsa_circRNA_100913	10.9182	7.42434	-3.40659	10.6044	1.96e-05
hsa_circRNA_100213	9.30674	7.42116	-1.89673	3.72367	0.000447383
hsa_circRNA_006751	8.48057	7.42101	-1.13357	2.19401	0.0193802
hsa_circRNA_103246	8.88151	7.41927	-1.5142	2.85641	0.00130401
hsa_circRNA_406108	5.61263	7.41924	1.77477	3.42185	7.41e-05
hsa_circRNA_103435	10.4945	7.41731	-2.95372	7.74744	2.19e-05
hsa_circRNA_036599	9.31565	7.41651	-1.81037	3.50733	0.000104722
hsa_circRNA_081536	6.18913	7.41599	1.20663	2.30799	0.00154589
hsa_circRNA_100912	9.96863	7.41586	-2.41301	5.32586	0.00115509
hsa_circRNA_400896	6.27135	7.41439	1.09033	2.12922	0.00181906
hsa_circRNA_104849	5.91991	7.41359	1.46064	2.75231	0.00349445
hsa_circRNA_040223	6.03618	7.41273	1.31757	2.49246	3.02e-07
hsa_circRNA_079049	5.78706	7.41167	1.56382	2.95636	0.000219674
hsa_circRNA_008901	10.0057	7.41107	-2.57159	5.94463	7.86e-09
hsa_circRNA_020068	6.31534	7.40991	1.06842	2.09714	5.53e-05
hsa_circRNA_103608	6.21706	7.40863	1.02896	2.04055	0.0102146
hsa_circRNA_104004	6.04777	7.40617	1.30578	2.47218	6.41e-06
hsa_circRNA_058097	5.45658	7.40313	1.85849	3.62629	1.44e-05
hsa_circRNA_102175	9.32882	7.40271	-1.84895	3.60237	4.59e-06
hsa_circRNA_100152	8.55226	7.40269	-1.19435	2.28842	0.00901305
hsa_circRNA_091743	6.19952	7.40175	1.18159	2.26826	9.14e-05
hsa_circRNA_102780	8.99752	7.3991	-1.50573	2.83969	9.98e-05
hsa_circRNA_002115	10.0944	7.39743	-2.48146	5.58462	0.000148594
hsa_circRNA_406755	6.25609	7.39669	1.06756	2.09588	3.44e-05
hsa_circRNA_104346	8.99412	7.3957	-1.76157	3.39066	0.0100013
hsa_circRNA_100174	6.00092	7.39192	1.23878	2.36	0.00415781
hsa_circRNA_103967	9.62777	7.3901	-2.24931	4.75454	1.82e-05
hsa_circRNA_000202	5.48931	7.38991	1.772	3.41526	2e-06
hsa_circRNA_101797	9.4339	7.3899	-1.87415	3.66587	0.000193148
hsa_circRNA_102615	6.30397	7.38828	1.05587	2.07897	0.000888981
hsa_circRNA_000393	5.71822	7.38778	1.60205	3.03574	0.00103744
hsa_circRNA_101670	6.19473	7.38591	1.22803	2.34246	0.0362112
hsa_circRNA_005970	9.67592	7.38571	-2.22545	4.67658	4.71e-07
hsa_circRNA_101163	9.48121	7.37832	-1.99552	3.98761	0.000170635
hsa_circRNA_104234	9.54909	7.37797	-2.14996	4.43815	1e-05
hsa_circRNA_100298	10.1128	7.3744	-2.63022	6.19122	2.44e-05
hsa_circRNA_061260	6.0113	7.37389	1.11085	2.15973	0.0390116
hsa_circRNA_101695	5.68842	7.37323	1.61184	3.05642	0.00152424
hsa_circRNA_406986	5.94435	7.37294	1.37915	2.60115	0.00249938
hsa_circRNA_017202	8.58258	7.3716	-1.21516	2.32167	3.31e-05
hsa_circRNA_007460	10.1899	7.37127	-2.685	6.43079	6.02e-06
hsa_circRNA_103291	5.94017	7.37031	1.35737	2.56217	0.000379289
hsa_circRNA_004097	5.38711	7.36719	1.84136	3.58347	0.000370015
hsa_circRNA_102290	6.10497	7.36718	1.14773	2.21565	0.01037
hsa_circRNA_404627	6.08526	7.36461	1.25469	2.38616	1.08e-09
hsa_circRNA_089921	6.3224	7.36285	1.06953	2.09875	8.14e-05
hsa_circRNA_101478	6.14963	7.36267	1.1203	2.17393	0.00322563
hsa_circRNA_407008	6.20016	7.3625	1.02042	2.02851	0.000485429
hsa_circRNA_009723	5.74482	7.36132	1.58381	2.99759	0.00137969
hsa_circRNA_026428	5.99969	7.36029	1.30419	2.46945	2.41e-07
hsa_circRNA_100977	10.3275	7.36027	-2.84915	7.20575	0.000264172
hsa_circRNA_103756	10.4846	7.35957	-3.00314	8.01741	2.54e-05
hsa_circRNA_104840	5.8556	7.35875	1.41978	2.67545	0.000330439
hsa_circRNA_100917	11.062	7.35835	-3.61232	12.2298	1.16e-05
hsa_circRNA_101889	6.20404	7.35439	1.03081	2.04317	0.0353492
hsa_circRNA_104062	10.8771	7.35391	-3.41164	10.6416	5e-05
hsa_circRNA_405688	6.14959	7.35347	1.09019	2.12902	1.01e-05
hsa_circRNA_401876	6.14286	7.3531	1.16856	2.24787	0.000242958
hsa_circRNA_400658	6.08183	7.35064	1.19312	2.28647	0.00320957
hsa_circRNA_100949	10.8308	7.35055	-3.42602	10.7482	2.19e-07
hsa_circRNA_000010	6.04446	7.35054	1.24944	2.3775	3.09e-05
hsa_circRNA_406541	5.89222	7.35009	1.39837	2.63603	0.000677307
hsa_circRNA_101237	10.7248	7.34801	-3.18159	9.07307	1.33e-05
hsa_circRNA_048728	6.00799	7.34709	1.35207	2.55278	8.09e-05
hsa_circRNA_057362	6.24159	7.33953	1.05234	2.07389	0.000534429
hsa_circRNA_103160	6.40772	7.33944	1.00239	2.00331	0.00391115
hsa_circRNA_405732	5.73086	7.33889	1.61264	3.05811	1.84e-07
hsa_circRNA_104590	8.57423	7.3385	-1.15554	2.22768	0.00199417
hsa_circRNA_077877	6.00939	7.33744	1.30095	2.46391	1.26e-05
hsa_circRNA_040822	8.54764	7.33741	-1.04079	2.05736	0.0129585
hsa_circRNA_404801	5.7867	7.33569	1.52665	2.88115	1.47e-06
hsa_circRNA_001131	5.68535	7.33424	1.4971	2.82275	0.000290188
hsa_circRNA_062634	5.9746	7.33423	1.21452	2.32063	0.0290947
hsa_circRNA_100830	10.4501	7.33407	-3.10034	8.57621	4.01e-06
hsa_circRNA_104767	9.44888	7.33369	-1.9327	3.81768	1.01e-05
hsa_circRNA_100078	10.2533	7.33212	-2.69567	6.47853	1.61e-05
hsa_circRNA_004804	8.83634	7.3318	-1.55761	2.94366	0.00124309
hsa_circRNA_102867	6.05473	7.32935	1.07653	2.10896	0.0127792
hsa_circRNA_104529	6.03176	7.32879	1.20854	2.31104	0.00300987
hsa_circRNA_102646	9.41267	7.32875	-1.96663	3.90855	0.000788804
hsa_circRNA_004150	8.46217	7.32631	-1.0974	2.13969	0.000469766
hsa_circRNA_101919	5.96797	7.32557	1.34332	2.53734	4.43e-06
hsa_circRNA_015879	6.06951	7.32504	1.24871	2.37629	7.15e-06
hsa_circRNA_066246	5.33408	7.325	1.89187	3.71116	0.000430705
hsa_circRNA_102766	5.51055	7.3199	1.75794	3.38215	8.28e-06
hsa_circRNA_102537	9.00311	7.31962	-1.5029	2.83411	0.00159356
hsa_circRNA_002254	8.76918	7.317	-1.36259	2.57146	0.000154242
hsa_circRNA_100597	9.53432	7.31677	-2.08131	4.23191	0.000241772
hsa_circRNA_400572	5.63945	7.3156	1.6034	3.03859	0.000280228
hsa_circRNA_103430	9.31519	7.31502	-1.9462	3.85358	0.00089039
hsa_circRNA_021555	5.88913	7.31465	1.35371	2.55569	9.12e-07
hsa_circRNA_102392	9.61583	7.31175	-2.25973	4.78902	5.46e-07
hsa_circRNA_406445	5.93098	7.31137	1.32083	2.4981	0.000239819
hsa_circRNA_103481	9.32536	7.30962	-1.91488	3.77081	5.16e-05
hsa_circRNA_062996	5.8892	7.30902	1.30122	2.46438	0.000145692
hsa_circRNA_100671	8.68536	7.30868	-1.30697	2.47422	3.73e-05
hsa_circRNA_100659	6.01862	7.30729	1.19337	2.28687	0.000101294
hsa_circRNA_000313	5.97529	7.30048	1.26646	2.40571	0.000127126
hsa_circRNA_104741	8.36779	7.29821	-1.04194	2.059	0.00643046
hsa_circRNA_100299	9.94133	7.29763	-2.53413	5.79226	1.75e-05
hsa_circRNA_102614	6.14148	7.29721	1.02179	2.03044	0.00895222
hsa_circRNA_103861	8.8683	7.29553	-1.53325	2.89438	2.01e-05
hsa_circRNA_100588	5.99303	7.29537	1.2689	2.40978	0.000310376
hsa_circRNA_045697	5.73735	7.29307	1.45808	2.74743	9.11e-06
hsa_circRNA_014085	6.24063	7.29302	1.07392	2.10514	5.07e-05
hsa_circRNA_080731	6.17599	7.29216	1.1468	2.21422	0.026846
hsa_circRNA_103491	9.40067	7.2918	-2.17621	4.51965	0.000307596
hsa_circRNA_101231	10.8005	7.29166	-3.45814	10.9902	3.3e-06
hsa_circRNA_407188	6.0498	7.29142	1.22149	2.33188	2.43e-05
hsa_circRNA_103292	8.53224	7.28919	-1.09747	2.13979	0.0153574
hsa_circRNA_100733	5.97983	7.28897	1.30422	2.4695	5.52e-07
hsa_circRNA_101119	9.97343	7.28879	-2.49111	5.62211	1.96e-05
hsa_circRNA_103554	9.30862	7.28741	-2.02797	4.07831	0.000307825
hsa_circRNA_405992	9.20457	7.28686	-1.82492	3.54287	1.55e-05
hsa_circRNA_104619	6.04045	7.28598	1.18862	2.27935	0.0070621
hsa_circRNA_092365	8.94546	7.28586	-1.49923	2.82691	0.00141137
hsa_circRNA_088780	6.10439	7.28482	1.14698	2.2145	0.000340294
hsa_circRNA_101440	8.85562	7.28212	-1.5125	2.85303	0.00217799
hsa_circRNA_104634	9.1036	7.27851	-1.61264	3.0581	0.000808063
hsa_circRNA_001768	5.99127	7.27724	1.18226	2.26933	0.000286776
hsa_circRNA_104655	5.73613	7.27693	1.61106	3.05477	0.00767048
hsa_circRNA_055957	5.84072	7.27685	1.41763	2.67147	5.45e-07
hsa_circRNA_104442	8.77303	7.27669	-1.29605	2.45555	0.00302965
hsa_circRNA_406975	5.80305	7.27529	1.32086	2.49815	1.07e-05
hsa_circRNA_103940	5.99104	7.27091	1.24123	2.364	0.000785814
hsa_circRNA_042937	6.00194	7.26862	1.23338	2.35118	7.27e-05
hsa_circRNA_100097	9.72844	7.26687	-2.33023	5.02885	3.81e-05
hsa_circRNA_100797	9.34852	7.26648	-1.97848	3.94079	6.8e-05
hsa_circRNA_404802	10.3016	7.26633	-2.92533	7.59645	2.9e-07
hsa_circRNA_100738	9.08824	7.26554	-1.71478	3.28246	0.0013804
hsa_circRNA_104419	9.42228	7.26383	-2.042	4.11816	5.69e-06
hsa_circRNA_051781	6.06807	7.26369	1.16236	2.23823	0.00136615
hsa_circRNA_104531	9.97387	7.26024	-2.4969	5.64471	0.000285641
hsa_circRNA_405711	5.9195	7.26014	1.29466	2.45319	3.83e-07
hsa_circRNA_100723	5.95896	7.25967	1.24934	2.37732	3.2e-06
hsa_circRNA_100070	5.86697	7.25907	1.27391	2.41816	0.000284707
hsa_circRNA_101862	6.1748	7.25756	1.20077	2.29862	0.0115109
hsa_circRNA_100071	6.29937	7.25648	1.01301	2.01812	0.000953421
hsa_circRNA_406714	5.85494	7.25635	1.35458	2.55722	0.000889992
hsa_circRNA_404062	9.32676	7.25407	-1.94236	3.84333	7.2e-06
hsa_circRNA_004142	6.20995	7.25377	1.0968	2.1388	5.37e-05
hsa_circRNA_004819	5.83626	7.25365	1.44211	2.71717	0.000217639
hsa_circRNA_102845	9.26764	7.25318	-1.90864	3.75454	3.41e-05
hsa_circRNA_001288	5.80434	7.25242	1.34229	2.53553	2.49e-05
hsa_circRNA_402533	6.06907	7.25219	1.07955	2.11337	0.0241102
hsa_circRNA_092547	10.6333	7.24863	-3.23656	9.42541	5.71e-05
hsa_circRNA_051825	6.148	7.24858	1.1045	2.15024	0.00213717
hsa_circRNA_102289	5.79771	7.24645	1.27608	2.42179	0.00245001
hsa_circRNA_012172	6.15701	7.2462	1.08703	2.12436	4.84e-05
hsa_circRNA_103818	5.83142	7.24616	1.39796	2.63528	0.00213837
hsa_circRNA_405165	9.68482	7.24611	-2.37092	5.17271	0.000262578
hsa_circRNA_102436	5.97995	7.24289	1.19141	2.28376	1.99e-05
hsa_circRNA_102512	8.34309	7.24241	-1.00414	2.00575	3.38e-05
hsa_circRNA_104060	9.89081	7.24113	-2.67706	6.39549	1.1e-06
hsa_circRNA_006505	5.70267	7.24088	1.49873	2.82594	0.0102893
hsa_circRNA_104498	5.8564	7.24034	1.2597	2.39446	0.00061825
hsa_circRNA_003792	6.10016	7.23792	1.06462	2.09162	0.000115332
hsa_circRNA_040466	8.29812	7.23627	-1.09453	2.13543	0.00343839
hsa_circRNA_102726	9.4152	7.23489	-2.08851	4.25309	5.21e-05
hsa_circRNA_404741	9.16633	7.23447	-1.73136	3.32041	0.000194223
hsa_circRNA_100477	8.79201	7.2297	-1.62915	3.0933	0.000335342
hsa_circRNA_405005	6.23308	7.22967	1.0253	2.03538	0.0279058
hsa_circRNA_011040	5.97261	7.22931	1.26343	2.40066	0.000127394
hsa_circRNA_100927	9.98718	7.22852	-2.64564	6.25772	9.17e-06
hsa_circRNA_061880	6.09128	7.22848	1.21148	2.31575	0.000698087
hsa_circRNA_404054	6.08129	7.2259	1.07434	2.10576	9.26e-06
hsa_circRNA_076777	10.204	7.22542	-2.87085	7.31497	3.53e-06
hsa_circRNA_103257	5.9446	7.22444	1.3256	2.50637	6.57e-05
hsa_circRNA_104861	8.22766	7.22289	-1.07051	2.10017	0.0323159
hsa_circRNA_103953	6.15767	7.2217	1.01974	2.02755	2.27e-05
hsa_circRNA_005073	6.1202	7.21702	1.0738	2.10497	0.00495577
hsa_circRNA_101044	8.40522	7.2167	-1.19053	2.28236	0.000264857
hsa_circRNA_104250	8.60025	7.21513	-1.38012	2.60289	4.12e-05
hsa_circRNA_031668	5.96709	7.21311	1.24995	2.37833	9.57e-05
hsa_circRNA_404903	5.93693	7.21148	1.20779	2.30984	0.000151806
hsa_circRNA_103465	6.07978	7.21011	1.02571	2.03597	0.00146877
hsa_circRNA_009107	5.65406	7.21001	1.48184	2.79304	3.35e-05
hsa_circRNA_043825	10.0191	7.20865	-2.71659	6.57315	1.77e-06
hsa_circRNA_405297	6.166	7.20831	1.06905	2.09806	2.09e-06
hsa_circRNA_038883	5.61817	7.20534	1.56421	2.95715	7.2e-05
hsa_circRNA_402150	5.58153	7.20484	1.40896	2.65545	0.0018394
hsa_circRNA_100924	10.0583	7.20479	-2.75026	6.72836	6.51e-05
hsa_circRNA_002074	5.74204	7.19971	1.29169	2.44815	0.0390213
hsa_circRNA_006497	9.58993	7.19962	-2.34854	5.09309	0.000268635
hsa_circRNA_405587	5.93683	7.19958	1.24283	2.36662	8.55e-06
hsa_circRNA_103044	8.99855	7.19933	-1.84137	3.5835	0.000489144
hsa_circRNA_102407	8.77023	7.19917	-1.41178	2.66066	0.00079224
hsa_circRNA_400025	5.85715	7.19714	1.26837	2.40889	7.3e-06
hsa_circRNA_100724	5.43208	7.19642	1.67958	3.20335	0.0010677
hsa_circRNA_003022	5.92622	7.19368	1.26679	2.40625	3.69e-06
hsa_circRNA_032547	6.04809	7.19309	1.16339	2.23982	0.00400139
hsa_circRNA_104319	6.07677	7.1906	1.06473	2.09178	0.00034401
hsa_circRNA_101518	9.63183	7.18651	-2.3976	5.26926	9.83e-05
hsa_circRNA_405689	5.97301	7.18522	1.09246	2.13238	2.23e-05
hsa_circRNA_101033	8.63898	7.18426	-1.29184	2.4484	0.00104407
hsa_circRNA_101331	9.80464	7.18326	-2.52858	5.77002	3.54e-05
hsa_circRNA_079804	8.35439	7.18139	-1.12489	2.18086	3.04e-05
hsa_circRNA_009438	6.0227	7.17668	1.1813	2.26781	7.39e-05
hsa_circRNA_017819	9.75073	7.17522	-2.61734	6.13616	2.02e-05
hsa_circRNA_102962	9.53017	7.17492	-2.24081	4.72662	1.26e-05
hsa_circRNA_101403	6.02327	7.17491	1.06248	2.08852	0.0211686
hsa_circRNA_103281	9.07048	7.1748	-1.75983	3.38659	0.000174639
hsa_circRNA_101632	6.03543	7.17448	1.11364	2.16391	5.24e-05
hsa_circRNA_101640	8.81995	7.17169	-1.55462	2.93756	3.02e-05
hsa_circRNA_101098	8.76801	7.17148	-1.44718	2.72674	0.000902015
hsa_circRNA_406343	6.00361	7.16885	1.18604	2.27527	0.000570859
hsa_circRNA_401953	5.81368	7.16402	1.35576	2.55932	5.6e-06
hsa_circRNA_102076	10.8434	7.16216	-3.54307	11.6565	1.11e-06
hsa_circRNA_002847	9.14174	7.16051	-1.8544	3.61601	2.79e-05
hsa_circRNA_104112	5.9548	7.15874	1.18534	2.27416	0.0187295
hsa_circRNA_104123	8.54665	7.15794	-1.21174	2.31618	0.000955082
hsa_circRNA_406313	5.47889	7.15791	1.64817	3.13436	0.000184786
hsa_circRNA_024542	6.02331	7.15396	1.12723	2.18439	0.000119989
hsa_circRNA_406889	5.80087	7.15195	1.26388	2.40141	0.000261735
hsa_circRNA_002147	9.36043	7.1511	-2.20467	4.6097	2.91e-05
hsa_circRNA_103860	10.1487	7.14982	-2.88123	7.36777	6.77e-06
hsa_circRNA_401004	9.78747	7.1427	-2.5801	5.97983	1.43e-06
hsa_circRNA_104718	5.90745	7.14162	1.2086	2.31114	0.03138
hsa_circRNA_101993	9.45336	7.13958	-2.21387	4.63917	1.2e-05
hsa_circRNA_092535	9.86787	7.13954	-2.5501	5.85674	1.78e-05
hsa_circRNA_401999	6.08003	7.13844	1.02769	2.03876	0.00029996
hsa_circRNA_100031	8.45922	7.1365	-1.22393	2.33582	0.00256805
hsa_circRNA_407193	8.78094	7.13609	-1.58302	2.99597	3.45e-05
hsa_circRNA_002553	9.33346	7.13515	-2.14963	4.43713	1.07e-05
hsa_circRNA_101937	5.68945	7.13514	1.30976	2.479	5.01e-05
hsa_circRNA_092443	5.76209	7.13507	1.16056	2.23544	0.00918182
hsa_circRNA_102794	8.80697	7.13503	-1.57775	2.98505	7.57e-05
hsa_circRNA_405445	5.67561	7.13471	1.35537	2.55863	0.000102053
hsa_circRNA_088200	5.76304	7.13317	1.29064	2.44637	0.0102765
hsa_circRNA_101102	10.4538	7.13167	-3.26321	9.60115	3.27e-07
hsa_circRNA_060170	5.97707	7.12983	1.09121	2.13052	1.07e-05
hsa_circRNA_101880	8.65411	7.12935	-1.51942	2.86675	0.0022275
hsa_circRNA_030281	9.2791	7.12683	-2.06059	4.17158	9.52e-05
hsa_circRNA_101348	10.6731	7.1263	-3.40642	10.6032	2.29e-05
hsa_circRNA_104687	8.46113	7.12537	-1.2662	2.40527	0.000169946
hsa_circRNA_100921	10.5955	7.12414	-3.40662	10.6046	1.59e-05
hsa_circRNA_405228	8.96091	7.12407	-1.84895	3.60238	0.00287506
hsa_circRNA_004930	8.78162	7.1228	-1.61525	3.06364	9.26e-06
hsa_circRNA_002615	8.28832	7.12193	-1.1846	2.273	0.00245076
hsa_circRNA_006337	9.17313	7.12084	-2.00009	4.00024	2e-06
hsa_circRNA_006270	5.60306	7.11998	1.44043	2.71402	0.00137127
hsa_circRNA_406401	6.00616	7.11972	1.09539	2.1367	4.13e-05
hsa_circRNA_005537	9.24584	7.11864	-2.02339	4.06537	0.00233552
hsa_circRNA_102387	10.6808	7.11786	-3.48915	11.2289	1.99e-07
hsa_circRNA_007771	5.83139	7.11724	1.26078	2.39625	4.69e-05
hsa_circRNA_407337	6.08107	7.11666	1.11706	2.16905	0.0048568
hsa_circRNA_092420	8.69747	7.11619	-1.45402	2.7397	2.38e-05
hsa_circRNA_100923	9.89925	7.11592	-2.69743	6.48648	0.000278819
hsa_circRNA_075379	6.24673	7.11344	1.00305	2.00423	0.0493129
hsa_circRNA_103719	9.98511	7.1131	-2.72747	6.62291	1.73e-05
hsa_circRNA_401491	8.97232	7.11226	-1.7497	3.36288	1.64e-05
hsa_circRNA_013187	5.3757	7.1117	1.66793	3.17758	0.000741464
hsa_circRNA_103109	8.47152	7.11137	-1.30184	2.46544	0.000808547
hsa_circRNA_092500	8.7651	7.11091	-1.68384	3.21282	0.00024011
hsa_circRNA_400076	5.85954	7.11085	1.17129	2.25212	0.000280457
hsa_circRNA_047733	6.15274	7.10833	1.01975	2.02757	7.31e-05
hsa_circRNA_101563	9.65292	7.10792	-2.53861	5.8103	0.00025557
hsa_circRNA_061110	5.9367	7.10744	1.1745	2.25715	0.00790272
hsa_circRNA_406060	5.8957	7.10743	1.12828	2.18598	5.69e-07
hsa_circRNA_102788	5.17429	7.10634	1.88893	3.70362	0.000102694
hsa_circRNA_001638	8.31622	7.10613	-1.13392	2.19454	0.0035661
hsa_circRNA_100926	10.0043	7.10365	-2.81255	7.02524	2.78e-05
hsa_circRNA_048584	5.84921	7.10229	1.30411	2.46931	0.0163557
hsa_circRNA_400694	9.2594	7.10214	-1.98744	3.96533	0.000560456
hsa_circRNA_001406	8.8724	7.10041	-1.55735	2.94313	0.000182902
hsa_circRNA_101147	8.72031	7.10034	-1.62894	3.09285	0.000117841
hsa_circRNA_405048	9.40046	7.09992	-2.15595	4.45664	0.000126193
hsa_circRNA_407149	8.24695	7.0986	-1.13299	2.19313	0.000570189
hsa_circRNA_407109	5.56123	7.09617	1.50883	2.84579	0.000734441
hsa_circRNA_042268	5.94353	7.09564	1.07097	2.10084	0.00208039
hsa_circRNA_003540	5.98025	7.09322	1.1203	2.17393	5.53e-05
hsa_circRNA_400780	5.69742	7.09099	1.3586	2.56436	0.00167608
hsa_circRNA_405343	5.17718	7.09063	1.74393	3.34947	0.0302159
hsa_circRNA_101182	8.38182	7.09049	-1.37159	2.58756	0.00125768
hsa_circRNA_001802	10.0771	7.09011	-2.92959	7.61896	2.52e-05
hsa_circRNA_003493	8.39415	7.08876	-1.24981	2.3781	5.42e-05
hsa_circRNA_092453	5.77022	7.08851	1.11986	2.17327	0.00116868
hsa_circRNA_050139	5.84599	7.08567	1.24895	2.37668	0.00126427
hsa_circRNA_003275	8.84621	7.08536	-1.63269	3.10091	0.000114204
hsa_circRNA_083913	5.95115	7.08521	1.1839	2.2719	0.013769
hsa_circRNA_104203	8.36016	7.08479	-1.44531	2.72321	0.000776114
hsa_circRNA_104018	9.78339	7.08468	-2.55111	5.86085	8.86e-07
hsa_circRNA_406751	5.75331	7.08421	1.24197	2.36521	6.14e-05
hsa_circRNA_000556	9.85626	7.08266	-2.55384	5.87196	0.000271962
hsa_circRNA_103495	9.32375	7.08228	-2.19677	4.58451	4.68e-05
hsa_circRNA_033149	10.2775	7.0815	-3.10654	8.61316	1.13e-06
hsa_circRNA_104494	8.8442	7.08125	-1.47405	2.778	0.00360174
hsa_circRNA_104792	9.08937	7.07926	-1.96419	3.90192	0.000287546
hsa_circRNA_102300	8.76874	7.07833	-1.67063	3.18354	0.000221898
hsa_circRNA_059711	5.81161	7.0743	1.19407	2.28798	0.000218539
hsa_circRNA_103757	10.6014	7.07384	-3.41355	10.6557	4.98e-06
hsa_circRNA_103592	5.34715	7.07326	1.60417	3.0402	0.00288457
hsa_circRNA_002806	5.85401	7.07286	1.11854	2.17128	4.46e-06
hsa_circRNA_002994	5.30965	7.07149	1.5726	2.97439	0.00097709
hsa_circRNA_406442	5.06416	7.07056	1.91937	3.78257	0.00780878
hsa_circRNA_102851	10.1876	7.06992	-3.00519	8.02885	7.77e-06
hsa_circRNA_406169	5.95945	7.06776	1.10869	2.1565	0.0122653
hsa_circRNA_004643	5.82758	7.06661	1.18069	2.26685	3.6e-05
hsa_circRNA_104252	8.1001	7.0662	-1.07302	2.10384	5.06e-05
hsa_circRNA_402321	8.17103	7.06016	-1.01641	2.02288	0.000350319
hsa_circRNA_400732	5.93472	7.05976	1.0651	2.09231	0.00451189
hsa_circRNA_102723	6.01885	7.05944	1.11932	2.17245	0.0018132
hsa_circRNA_103489	9.07976	7.05931	-1.97444	3.92976	0.000185878
hsa_circRNA_003427	5.39387	7.05862	1.56076	2.9501	0.00832611
hsa_circRNA_405511	5.25865	7.05727	1.73561	3.33019	0.000124925
hsa_circRNA_006660	8.87693	7.05695	-1.66364	3.16815	0.000750914
hsa_circRNA_001027	5.87773	7.05529	1.10518	2.15125	0.00049741
hsa_circRNA_102767	5.97066	7.05486	1.16359	2.24014	0.000201558
hsa_circRNA_001262	5.67476	7.05469	1.35597	2.55969	0.000267065
hsa_circRNA_104638	10.2252	7.05421	-2.97511	7.86315	7.47e-05
hsa_circRNA_102135	9.71413	7.05017	-2.5225	5.74576	1.59e-05
hsa_circRNA_009078	5.45643	7.05007	1.47943	2.78838	0.00850306
hsa_circRNA_012123	5.46599	7.05	1.52886	2.88558	0.000105948
hsa_circRNA_003184	10.2683	7.0499	-3.04874	8.2749	3.98e-05
hsa_circRNA_017469	5.91001	7.04982	1.11034	2.15896	2.21e-05
hsa_circRNA_008608	8.06866	7.0494	-1.0423	2.05951	0.000513895
hsa_circRNA_401515	5.66474	7.0449	1.3458	2.54171	7.77e-05
hsa_circRNA_004910	9.01288	7.04401	-1.90309	3.74014	0.000318181
hsa_circRNA_103927	5.76409	7.04143	1.18062	2.26674	0.000796865
hsa_circRNA_104084	5.91374	7.03969	1.10029	2.14398	0.0282101
hsa_circRNA_004666	8.74417	7.03947	-1.76838	3.40672	6.28e-05
hsa_circRNA_104587	5.50962	7.03902	1.32735	2.50941	0.00097549
hsa_circRNA_100312	9.25868	7.03876	-2.18737	4.55473	6.55e-05
hsa_circRNA_404858	5.13649	7.03643	1.72125	3.29722	8.22e-05
hsa_circRNA_009062	9.25385	7.03437	-2.16086	4.4718	4.72e-05
hsa_circRNA_101366	5.93382	7.03335	1.04386	2.06174	0.0116533
hsa_circRNA_012889	5.65127	7.02962	1.33003	2.51407	0.000929464
hsa_circRNA_102383	10.3753	7.02803	-3.27194	9.65942	4.97e-06
hsa_circRNA_100928	9.90766	7.02726	-2.76309	6.78847	0.000133969
hsa_circRNA_100289	8.61626	7.02583	-1.49434	2.81736	0.000429845
hsa_circRNA_405609	8.45918	7.02556	-1.41017	2.65768	7.28e-06
hsa_circRNA_007335	8.1672	7.0248	-1.07674	2.10927	0.0291382
hsa_circRNA_102659	9.54803	7.02474	-2.39256	5.25089	8.56e-06
hsa_circRNA_402094	5.70093	7.02319	1.13409	2.1948	0.00782207
hsa_circRNA_007379	9.12508	7.02228	-1.86779	3.64973	0.00157962
hsa_circRNA_031859	8.72003	7.02088	-1.71306	3.27855	0.00228534
hsa_circRNA_003991	8.25743	7.02051	-1.2633	2.40044	1.46e-05
hsa_circRNA_405637	5.72641	7.01777	1.25951	2.39415	1.59e-06
hsa_circRNA_002448	8.16264	7.01769	-1.03645	2.05117	0.000220506
hsa_circRNA_000896	5.86361	7.01733	1.15114	2.2209	0.0172769
hsa_circRNA_104892	5.53413	7.01639	1.42004	2.67593	3.74e-05
hsa_circRNA_006575	8.32658	7.01137	-1.21587	2.32281	0.00134467
hsa_circRNA_406223	5.58919	7.01129	1.40082	2.64052	0.000201043
hsa_circRNA_101151	10.1751	7.01108	-3.07164	8.40726	1.56e-05
hsa_circRNA_102885	5.64203	7.00992	1.1587	2.23257	5.18e-08
hsa_circRNA_401289	5.93432	7.00805	1.07157	2.10172	2.68e-05
hsa_circRNA_406149	8.42354	7.00767	-1.21646	2.32376	0.00446427
hsa_circRNA_000935	5.90069	7.00594	1.03602	2.05056	0.00213197
[truncated: 1,610 more rows]
